# Supplementary material for: Designing PrEP and early HIV treatment interventions for implementation among female sex workers in South Africa: developing and learning from a formative research process
Source: PubMed Central journal article supplement (PMC6009452; doi:10.1136/bmjopen-2017-019292), 2018-06-14
Supplement: bmjopen-2017-019292.draft_revisions.pdf [file bmjopen-2017-019292.draft_revisions.pdf]

# BMJ Open

BMJ Open is committed to open peer review. As part of this commitment we make the peer review history of every article we publish publicly available.

When an article is published we post the peer reviewers' comments and the authors' responses online. We also post the versions of the paper that were used during peer review. These are the versions that the peer review comments apply to.

The versions of the paper that follow are the versions that were submitted during the peer review process. They are not the versions of record or the final published versions. They should not be cited or distributed as the published version of this manuscript.

BMJ Open is an open access journal and the full, final, typeset and author-corrected version of record of the manuscript is available on our site with no access controls, subscription charges or pay-per-view fees (<http://bmjopen.bmj.com>).

If you have any questions on BMJ Open's open peer review process please email [info.bmjopen@bmj.com](mailto:info.bmjopen@bmj.com)

# BMJ Open

## Designing PrEP and early HIV treatment interventions for implementation among female sex workers in South Africa: developing and learning from a formative research process

|                               |                                                                                                                                                                                                                                                                                                                                                                                                                                                                                                                                                                                                    |
|-------------------------------|----------------------------------------------------------------------------------------------------------------------------------------------------------------------------------------------------------------------------------------------------------------------------------------------------------------------------------------------------------------------------------------------------------------------------------------------------------------------------------------------------------------------------------------------------------------------------------------------------|
| Journal:                      | <i>BMJ Open</i>                                                                                                                                                                                                                                                                                                                                                                                                                                                                                                                                                                                    |
| Manuscript ID                 | bmjopen-2017-019292                                                                                                                                                                                                                                                                                                                                                                                                                                                                                                                                                                                |
| Article Type:                 | Research                                                                                                                                                                                                                                                                                                                                                                                                                                                                                                                                                                                           |
| Date Submitted by the Author: | 29-Aug-2017                                                                                                                                                                                                                                                                                                                                                                                                                                                                                                                                                                                        |
| Complete List of Authors:     | Eakle, Robyn; Wits Reproductive Health and HIV Institute, ; London School of Hygiene and Tropical Medicine, Social and Environmental Health Research<br>Mutanha, Nyaradzo; Wits Reproductive Health and HIV Institute<br>Mbogua, Judie<br>Sibanyoni, Maria ; Wits Reproductive Health and HIV Institute<br>Bourne, Adam; La Trobe University, Australian Research Centre for Sex, Health & Society<br>Gomez, Gabriela; London School of Hygiene and Tropical Medicine,<br>Venter, WD Francois; University of the Witwatersrand, Wits RHI<br>Rees, Helen; University of the Witwatersrand, Wits RHI |
| Keywords:                     | Sex work, HIV prevention, pre-exposure prophylaxis, formative research                                                                                                                                                                                                                                                                                                                                                                                                                                                                                                                             |
|                               |                                                                                                                                                                                                                                                                                                                                                                                                                                                                                                                                                                                                    |

SCHOLARONE™  
Manuscripts

1  
2  
3 **Designing PrEP and early HIV treatment interventions for implementation among female sex**  
4 **workers in South Africa: developing and learning from a formative research process**  
5

6 Robyn Eakle\*<sup>1,2,3</sup>, Nyaradzo Mutanha<sup>1</sup>, Judie Mbogua<sup>1</sup>, Maria Sibanyoni<sup>1</sup>, Adam Bourne<sup>4</sup>, Gabriela  
7 Gomez<sup>1,2</sup>, Francois Venter<sup>1</sup>, Helen Rees<sup>1</sup>  
8  
9

10  
11 <sup>1</sup>Wits Reproductive Health and HIV Institute, Faculty of Health Sciences, University of the  
12 Witwatersrand, Johannesburg, South Africa

13 <sup>2</sup>Social and Mathematical Epidemiology (SaME), Department of Global Health and Development  
14 London School of Hygiene and Tropical Medicine, UK

15 <sup>3</sup>Sigma Research, Department of Social and Environmental Health Research, London School of  
16 Hygiene and Tropical Medicine, UK

17 <sup>4</sup>Australian Research Centre for Sex, Health & Society, La Trobe University, Melbourne, Australia.  
18  
19  
20  
21

22 \*Corresponding author:

23 Robyn Eakle

24 Wits Reproductive Health & HIV Institute

25 University of the Witwatersrand,

26 Hillbrow Health Precinct

27 22 Esselen Street

28 Hillbrow, 2001

29 Johannesburg

30 South Africa

31 e: reakle@wrhi.ac.za  
32  
33  
34

35 Author emails:

36 Robyn Eakle [robyn.eakle@lshtm.ac.uk](mailto:robyn.eakle@lshtm.ac.uk); reakle@wrhi.ac.za

37 Nyaradzo Mutanha [missnyarie@gmail.com](mailto:missnyarie@gmail.com)

38 Judie Mbogua [judie.mbogua@gmail.com](mailto:judie.mbogua@gmail.com)

39 Maria Sibanyoni [msibanyoni@wrhi.ac.za](mailto:msibanyoni@wrhi.ac.za)

40 Adam Bourne [A.Bourne@latrobe.edu.au](mailto:A.Bourne@latrobe.edu.au)

41 Gabriela Gomez [Gabriela.Gomez@lshtm.ac.uk](mailto:Gabriela.Gomez@lshtm.ac.uk)

42 Francois Venter [fventer@wrhi.ac.za](mailto:fventer@wrhi.ac.za)

43 Helen Rees [hrees@wrhi.ac.za](mailto:hrees@wrhi.ac.za)  
44  
45  
46  
47

48 Word count: 5,446

49 Number of figures/tables: 1

50 References: 25  
51  
52

53 Key words: HIV prevention, biomedical prevention products, pre-exposure prophylaxis (PrEP), sex  
54 work, formative research  
55  
56  
57

## Abstract

### Objectives

This paper examines how an inductive approach, based on the principles of grounded theory, to formative research influenced the design and execution of oral pre-exposure prophylaxis (PrEP) and early antiretroviral (ART) interventions for female sex workers (FSWs) in South Africa.

### Setting

The formative research was carried out in a variety of locations as dictated by the inductive approach. These included five sites in and around sex worker clinics, and at stakeholder offices.

### Participants

Participants in this research included stakeholders, experts in the field, and FSWs. Since this was an evolving, inductive approach to research, numbers of participants were not always tabulated except in the case of focus group discussions (FGDs).

### Results

Results consisted of methods chosen and subsequent data. Five chosen methods were: 1) stakeholder consultations launching and evolving the research; 2) engagement with FSW communities and working environments including hotspot mapping and clinic interactions; 3) site feasibility assessments for site selection; 4) supportive structures development for retention and adherence; 5) FGDs conducted with FSWs to explore specifics of acceptability. This process identified implementation barriers, opportunities, and research gaps critical to intervention design. Two sites were selected in Johannesburg and Pretoria, out of five considered. The contexts of the two urban sites varied, necessitating adjustments to intervention implementation.

### Conclusions

Using an inductive approach allowed for a wide range of perspectives, defining population needs and how to best reach them. This research illustrated how similar sex work environments can vary and how implementation of interventions may not be uniform across contexts. Lessons learned in details could assist in future project designs and implementation of new interventions where feasibility, social and cultural factors affecting acceptability must be considered.

### Strengths and Limitations

- This formative research process drew on principles of grounded theory allowing for an inductive, iterative approach to drive the selection of the most appropriate methods for gathering a broad spectrum of data aimed at intervention design.
- Five components were selected through the research process, providing an array of data for decision making and intervention design.
- This was a systematic approach in five known sex worker sites and final sites were chosen for their nearer uniformity than for diversity; results may not translate beyond this study, however lessons learned will be applicable.

## Introduction

Several guidance documents highlight the need for formative research both when preparing for larger studies and to design the implementation of new public health HIV interventions (1,2). Formative research includes the assessment of feasibility, reach, acceptability, and need of populations to strengthen planned uptake and use of interventions. In particular, formative research aims to ensure the capacity for physical implementation and responsiveness to cultural, social, economic and physical environments (3–5). However, this phase of work is frequently not reported and important lessons learned may be lost. This paper describes the detailed decision making and conduct of formative research undertaken to design two new HIV prevention and treatment interventions delivered to female sex workers in a demonstration project in South Africa.

Oral pre-exposure prophylaxis (PrEP) using antiretroviral (ARV) drugs given to an HIV-negative individual to prevent HIV infection, has been shown to be efficacious in multiple clinical trials (6). In addition, HIV treatment can be given to HIV-positive people as soon as they are diagnosed, and together with oral PrEP, is now the standard of care recommended in 2015 by the World Health Organization (WHO) (7).

Demonstration projects were recommended by the WHO in 2013 to generate evidence to answer implementation questions around feasibility and acceptability of oral PrEP (8). The call prioritised research for key populations such as sex workers, who have been shown by modelling to be ideal candidates for PrEP, especially in combination with early antiretroviral (ART) treatment for HIV-positive people (9–11). In the previous decade, HIV prevalence among female sex workers in South Africa was found to be between 46% and 69% (12–14), with recent research estimating a prevalence of 72% in the greater Johannesburg area (15).

This paper examines and illustrates how a comprehensive and inductive approach to formative research based on grounded theory (16) informed the design and execution of oral PrEP and early antiretroviral (ART) interventions for female sex workers in South Africa as part of the TAPS (Treatment And Prevention for Sex workers) Demonstration Project. The purpose of TAPS was to demonstrate how these two interventions could be implemented among female sex workers, and inform national rollout. We explore the approach and process undertaken to define and carry out the formative research, describe how the results informed the overall design of the oral PrEP and early ART interventions for TAPS, and reflect on challenges and successes encountered during the process.

## Methods

Formative research can include an array of methods depending on the final desired outcomes. For the design of interventions, formative research will include exploring feasibility of supportive structures and logistics for physical delivery of the intervention, as well as exploring the acceptability among populations in different contexts (2).

The overall aims of the larger TAPS Demonstration Project were to explore whether FSWs will take up early ART or PrEP, whether the service delivery mechanism is capable of handling the increase in

1  
2  
3 resource needs that might be required, and what the implications of the implementation of these  
4 interventions might be, including overall costs should the interventions be scaled up (17). TAPS is  
5 part of the Wits RHI Sex Worker Programme (SWP), a comprehensive health and well-being  
6 programme for sex workers running for over 20 years in Johannesburg and other provinces in South  
7 Africa (18).  
8  
9

10 While TAPS itself aimed to answer questions of feasibility and acceptability in the actual delivery of  
11 PrEP and early ART for female sex workers, the formative research began with foundational  
12 concepts of feasibility and acceptability in order to design interventions which could then be  
13 evaluated. These concepts addressed questions including: whether there was initial support from  
14 stakeholders to test the implementation of PrEP and early ART; where could the interventions be  
15 delivered, how, and by whom; how to engage with female sex workers; what was needed to  
16 generate demand; what structures should be included to support delivery; and how did women  
17 conceive of acceptability as users of the interventions?  
18  
19

20  
21 The formative research was conducted between August 2013 and March 2015. An inductive  
22 approach was employed based on the principles of grounded theory (16), where lessons emerging  
23 from the data at each step in the research process dictated decisions and subsequent steps. A  
24 grounded approach was chosen given the wide original scope required to consider a large range of  
25 logistical possibilities (e.g. site locations, adherence support structures) for the design and  
26 implementation of the interventions.  
27  
28

29 Decision making about which methods, sites, and stakeholders with whom to engage at each step  
30 was guided by feedback from consultations and discussions. Principles from the Good Participatory  
31 Practice Guidelines (GPP) developed by UNAIDS and AVAC were also followed, promoting multi-level  
32 stakeholder engagement as a core component of research (1). In line with these guidelines, a range  
33 of stakeholders were engaged, including sex workers, sex work related organizations, and the  
34 Department of Health (DoH). Community mobilization and outreach served to develop awareness  
35 around the interventions and generate demand led by peer educators who were current sex  
36 workers. Site assessments were conducted as part of feasibility which included site visits, and took  
37 into account findings from the community engagement and 'hot spot' mapping activities (identifying  
38 areas in which multiple sex workers operate). Additionally, focus group discussions (FGDs) were held  
39 with female sex workers at the final selected sites. Since the development of the methods for this  
40 process represents results in and of themselves, the specifics of how activities were chosen, why,  
41 and what was learned, are detailed as part of the results.  
42  
43  
44  
45

46 These activities eventually fell into five core methods: consultations, community engagement and  
47 mapping in the field, site assessments, participatory development of supportive structures and  
48 messaging, and FGDs. These methods generated three primary sources of data which informed the  
49 design of the interventions: 1) recorded minutes and reports of meetings with stakeholders; 2) field  
50 notes from engaging with sex worker communities and the environments within which they work,  
51 the process of hotspot mapping, experiences at potential clinic sites, and through the development  
52 of supportive structures; and, 3) transcripts of FGDs. Outcomes included the final design of the  
53 intervention incorporating perspectives of stakeholders gathered from the data, as well as relevant  
54  
55  
56  
57  
58  
59  
60

1  
2  
3 data collection and monitoring tools and supportive structures. These data were collected by a  
4 combination of researchers, peer educators, and clinical staff.  
5

### 6 **Data analysis**

7 Data were continuously collected and analysed based on the inductive approach over 18 months.  
8 Field notes, meeting notes, written reports, and FGD transcripts, were reviewed as activities  
9 occurred to identify key themes for further exploration and to define next steps, such as whether to  
10 disqualify a site due to low accessibility of the population or where to spend more time on  
11 community mobilization, education, and hotspot mapping. Site selection and staff recruitment  
12 represented the end of the first major phase of formative research. Community mobilization was  
13 then focused at the selected sites where testing of messaging, development of supportive systems,  
14 and development and testing of potential data collection tools continued led by clinic staff, peer  
15 educators, and potential end users.  
16  
17  
18

19 FGDs were conducted at each of the final selected sites in multiple languages to suit the participants  
20 and analysed following principles of thematic analysis (19), concentrating on themes originating  
21 from the FGD guides and those emerging from the discussions. Further details of the methods and  
22 results from the FGDs are presented in a companion paper (20).  
23  
24  
25

## 26 **Results**

27 Results are presented in five sections according to the chosen methods as products of the grounded  
28 approach. Sections include how and why methods were chosen and undertaken, and lessons learned  
29 influencing the design and execution of the interventions.  
30  
31

32 The five methods were: 1) stakeholder consultations both launching and iteratively progressing the  
33 research with stakeholder perspectives; 2) community engagement in the field with sex workers and  
34 the environments within which they work including hotspot mapping and experiences at potential  
35 clinic sites; 3) site assessments to determine feasibility of delivering the interventions in given sites;  
36 4) development of supportive structures to encourage retention and intervention adherence; 5)  
37 FGDs conducted with potential end-users to explore specifics of acceptability. A diagram of the five  
38 methods and the timeline during which they occurred is shown in Figure 1, illustrating how some  
39 activities were continuous and others discrete.  
40  
41  
42

43  
44 [Insert Figure 1. Formative Research Process Graphic]  
45

### 46 **Stakeholder Consultations**

47 Research began with this activity in order to ascertain stakeholder knowledge of and attitudes  
48 towards PrEP and early ART, as well as attitudes towards sex workers, which denoted initial levels of  
49 acceptability for the interventions in this population. We conducted three community consultations  
50 in 2013 with a total of 81 attendees from sex worker communities and partner organizations in  
51 Hillbrow and Ngodwana, where a new sex worker clinic was in the initiation phase. Additionally, an  
52 international consultation of 38 attendees was held in Hillbrow in 2013 and included representatives  
53 from sex work communities and organizations, funders, UNAIDS and WHO (21). These consultations  
54  
55  
56  
57

1  
2  
3 allowed for mapping of organizations and individuals to be included in future consultations and  
4 phases of formative research.  
5

6  
7 Smaller meetings were held with local DoH representatives in Johannesburg, Mpumalanga,  
8 Phongolo, and Pretoria to develop partnerships and support agreements for the TAPS project.  
9 Updates on, and engagement with, the plans for the TAPS interventions continued at quarterly and  
10 other scheduled meetings with local DoH and partners. Parallel meetings were also held with  
11 National DoH and the South African National AIDS Council (SANAC).  
12

13  
14 Feedback from the consultations pointed to varying degrees of support depending on local capacity  
15 to take on new interventions and scepticism towards the interventions, and particularly PrEP.  
16 Stakeholders affirmed that implementing PrEP and early ART together would promote synergistic  
17 delivery, as well as potentially normalize the use of ARVs in providing options to both HIV-negative  
18 and positive sex workers. However, concerns were voiced about adherence to PrEP (and sometimes  
19 early ART), as well as the potential for reduction in condom use, increases in risk of resistance to  
20 ARVs, and burden on scarce resources. These concerns indicated where special attention should be  
21 focused, such as providing evidence about possible resistance to PrEP and strategies for and the  
22 philosophy around supporting adherence and condom use, both in early messaging and education  
23 for sex workers, implementing and policy partners, as well as where to focus messaging and  
24 monitoring when implementing the interventions in TAPS.  
25  
26

27  
28 Sex workers at each potential site, driven largely by peer educators, helped to identify community  
29 organizations to engage for additional perspectives. Stakeholder engagement, both formal and  
30 informal, was tracked using an engagement tracking tool (22) developed by the HIV prevention  
31 advocacy group, AVAC. According to the data recorded in the tool, at least 20 meetings occurred  
32 during this time; however it is not possible to definitively quantify all of the contact points given that  
33 many interactions occurred on an ad hoc basis.  
34  
35

36  
37 Finally, consultations were also used to identify potential community advisory board (CAB)  
38 members. Meetings were held with individuals expressing interest in participation to inform them  
39 about the study and the CAB. These discussions continued until a CAB with up to 12 members was  
40 established. The CAB incorporated representatives from the local police force, sex worker advocacy  
41 organizations, sex workers themselves, and religious organizations. The CAB became both a result of  
42 the formative research and another source of consultation. The CAB was also a supportive structure  
43 for the interventions as members took it upon themselves to help spread knowledge of the  
44 interventions and the TAPS project, as well as lobby for expansion of the interventions to more sites,  
45 populations, and organizations.  
46  
47

#### 48 49 **Community Engagement and Mapping**

50 Data were also collected through community mobilization activities, accruing organically in scope  
51 and number, as discussions and interactions within the communities pointed to additional contacts  
52 for engagement. Each point of contact presented opportunities for new consultations and/or  
53 locations to conduct outreach. Feedback from the community about potentially adding PrEP and  
54 early treatment as new HIV prevention and treatment options was collected during peer and clinical  
55  
56  
57



1  
2  
3 staff outreach and workshops, which also aimed to generate demand for the interventions in the  
4 potential demonstration project site communities.  
5

6 Outreach is a specific set of activities in the sex worker service delivery field undertaken to educate  
7 clients about health, promote condom use, and provide a spectrum of services from HIV testing and  
8 counselling to full clinical services in mobile units in locations accessible to the population (23). Staff  
9 and peer educators from the SWP, in collaboration with TAPS staff and researchers, conducted  
10 outreach as a team to probe the local sex worker populations for any knowledge or perceptions of  
11 PrEP and early ART, as well as start to introduce related information. This outreach occurred as part  
12 of existing programming consisting of health talks, condom distribution, and mobile clinic services,  
13 through which we progressively integrated education and awareness of PrEP and early ART. As a  
14 core feature of the SWP, interventions were designed around outreach which was identified as a  
15 central aspect critical to generating demand and recruiting participants for TAPS. Through this  
16 activity, we noted working hours and environmental contexts, created hot spot maps to focus  
17 recruitment efforts, and learned about community perspectives of PrEP and early ART.  
18  
19  
20  
21

22 Feedback collected during outreach in the form of field notes provided contextual information as to  
23 where and how sex workers operated and how they interacted with health services, informing  
24 viability of given sites. cursory understanding of the interventions and how they might be taken up  
25 and used, determined which supportive structures would be needed and how messages would have  
26 to define the differences between PrEP and early ART. These outcomes are described in further  
27 sections.  
28  
29

### 30 **Site assessments and selection**

31 Assessments were conducted in five sites, after eliminating other sites spanning multiple provinces  
32 in the Wits RHI SWP. The five sites featured existing SWP clinics already delivering ARVs per national  
33 guidelines or sites with plans to implement new clinics, interest and support from the local  
34 communities, and potential access to a large group of FSWs in areas where HIV prevalence was high.  
35 This information came from the initial consultations and community engagement and mapping, as  
36 well as internal programme data. The five sites were: Ngodwana (rural village in Mpumalanga  
37 province), Phongolo (rural trucking site in KwaZulu Natal province), Hillbrow (central, inner-city  
38 Johannesburg), City Deep (peri-urban trucking site immediately south of Johannesburg), and the  
39 Pretoria central business district (CBD), the latter three of which were located in Gauteng province.  
40  
41  
42  
43

44 Narrowing the site selection was a critical step in moving forward with the design of the  
45 interventions. We aimed to select 2-3 sites (according to funding and capacity for oversight) with the  
46 following population criteria: access to a large number of FSWs (>200 according to early sample size  
47 calculations (17)), populations with a relatively balanced proportion of HIV-negative and HIV-positive  
48 women, and accessibility of clinics. Physical feasibility of the clinics to implement the interventions  
49 was assessed through reviews of space, clinical and laboratory infrastructure, required site  
50 permissions and approvals, and supply chain mechanisms. Support for the interventions was  
51 explored with local DoH and sex worker communities, as well as identification of logistical gaps. Site  
52 visits, hot spot mapping, and site assessments were conducted to determine the feasibility of  
53 delivering PrEP and early ART in each of the five sites.  
54  
55  
56  
57

1  
2  
3 Hot spot mapping was conducted to determine the number of FSWs working near the potential  
4 study sites as well as their working hours. The methods utilized and built on the results produced by  
5 the South African Health Monitoring Study (SAHMS), which drew on multiple mapping methods  
6 including time-location and the “wisdom-of-crowds” (15). This activity in combination with prior  
7 experience derived through the SWP, revealed that time and location of sex work is driven by client  
8 availability. Peak working hours were recorded in each sites as critical data dictating when women  
9 could be free to attend the clinics. Local languages at each site were also documented so that study  
10 materials could be translated and appropriate staff hired.  
11  
12

13  
14 Following the site assessments, three sites were eliminated. Ngodwana was eliminated due to lack  
15 of infrastructure and building delays, as well as lack of local support. Although there was initial  
16 interest, the implementation of the interventions potentially conflicted with limited resources and  
17 competing priorities in the area. The rural sex worker community in that location do not self-identify  
18 as sex workers which would have created challenges in being able to compare formal sex workers  
19 who self-identify and those who do not as part of project evaluation. The prevalence of HIV in  
20 Ngodwana was estimated locally to be around 75-80% in a relatively small village of <300 people  
21 mostly made up of sex workers, which also would have made it difficult to implement PrEP.  
22  
23

24  
25 City Deep was eliminated due to low clinic attendance, as well as the highly transient nature of the  
26 sex worker populations. Most of the women attending that clinic in arrived in the trucks coming  
27 from all over South Africa as well as neighbouring countries, which would have made commitment  
28 to regular, repeat clinic visits difficult. The Phongolo site, located next to the Swaziland border, was  
29 also eliminated as women tended to move in and out of the town and were away for as many as  
30 three to four months at a time.  
31  
32

33  
34 Two sites were finally selected: Hillbrow and Pretoria. Hillbrow was chosen because of the long-  
35 standing Wits RHI sex worker clinic which maintains strong ties to a large community of sex workers  
36 and their managers (brothel owners, ‘pimps’). At the time, HIV prevalence was estimated locally at  
37 around 50%. The clinic is situated in an area with a high concentration of brothels and street based  
38 locations within walking distance, but also with a number of surrounding outreach areas in the  
39 Johannesburg CBD, Yeoville, Jeppe, and Rosettenville. For these reasons, this site was considered  
40 “low-hanging fruit” for new intervention implementation, due to the substantial population of  
41 women at risk of HIV infection and as a location with solid community support.  
42  
43

44  
45 In Pretoria, tailored sex worker services and relationships with the community were new at the  
46 Sediba Hope clinic in the heart of the CBD, however there was strong support from the local DoH  
47 and expressed need from the sex workers themselves. The newness of such interventions in the area  
48 posed a challenge as to whether PrEP and early ART could be implemented within a new sex worker  
49 clinic in a new setting, and what it would take to do so.  
50

51  
52 After final site selection, further identifying and understanding the contexts in which the women  
53 worked and lived, as well as their perspectives of those environments, was explored through more  
54 intensive outreach and community engagement to determine, on a granular level, how the  
55 interventions could fit into their lives. Through the existing, long-term work of the SWP, there was  
56 awareness of different types of sex work locales, however the formative research allowed for a  
57  
58

1  
2  
3 deeper understanding of how these locales affected women's lives, and how they might affect their  
4 ability to take up and use the interventions.  
5

6 We assumed three general categories of sex work locales within the two urban settings. Brothels or  
7 hotels usually offer alcohol and entertainment, including combinations of music, dancing, and bar  
8 games. Many are former or existing hotels while others are simply bars with backrooms. Security  
9 protecting sex workers from violent clients is common in these establishments. Secondly, street-  
10 based sex work occurs in high traffic areas where sex workers pick up clients, and either join them in  
11 vehicles or have sex in a nearby location such as an alley. The third category comprises the "dark  
12 places" (IsiZulu: *mnyamandawo*), informal locations in empty lots or other uninhabited/unoccupied  
13 buildings or areas where sex workers build rudimentary structures in which to work.  
14  
15

16  
17 In both cities there is also a fourth, more hidden sex work market found online. Awareness of the  
18 online market was generated through conversations with sex workers during outreach and through  
19 peer educators, some of whom had online pages and knew of others with similar arrangements. Sex  
20 work conducted online usually involves regular clients met through a web-based connection, where  
21 business is conducted out of private spaces (personal homes, private spaces run by an owner,  
22 upscale hotels or clubs). This population was engaged later in the process as they are less visible to  
23 implementers and researchers, and difficult to build relationships with given their desire for  
24 anonymity.  
25  
26

27  
28 The different types of locales dictated how outreach needed to be conducted in order to generate  
29 demand for the interventions. In brothels it was possible to hold group health talks in spaces lent by  
30 women or brothel managers, but engaging with women on the street or dark places required time to  
31 build trust and a certain level of discretion to avoid unwanted attention. Careful planning around  
32 space needs (setting up a rented or borrowed space for sex workers based on the street, or bringing  
33 a mobile clinic) was also necessary in these locales. Similarly, it was not possible to go to a place of  
34 work to conduct health talks and recruitment for participants identified online, rather relationships  
35 were developed with one or two women who could act as advocates for the interventions within  
36 their community.  
37  
38

39  
40 The different risks and benefits for sex workers in each locale type were important to take into  
41 account. In brothels, women are protected by managers, staff, and security. On the street and "dark  
42 places" there is little or no security, unless organised by a pimp or a gang. Stories of violence and  
43 rape were commonly recorded throughout the formative work. Women reported violent  
44 interactions with clients, managers, community members, and often the police. These interactions  
45 highlighted the need for supportive referral structures, including for mental health, serious injuries,  
46 and criminal issues.  
47  
48

49  
50 Earning ability, directly associated with the type of sex work locale, was identified as an important  
51 aspect of being able to take time off to come to the clinic even for short periods of time. Sex workers  
52 operating in brothels tend to be able to charge higher rates for sex, usually between R50 and R150  
53 (about 3-10 USD), depending on the status of the brothel and the cost of room rental incurred by the  
54 sex workers. On the street, rates are around R50, and in a dark place sex can be R20-30 (about 1.30-  
55  
56  
57

1  
2  
3 2 USD). Making less money meant more difficulty in taking time away from work to attend the clinic  
4 for regular PrEP or treatment related appointments.  
5

### 6 **Development of supportive structures and messaging**

7 During consultations, a number of stakeholders provided views on possible components to be  
8 incorporated in the intervention design, in particular supportive structures. Mechanisms for  
9 supporting intervention adherence and retention in care were explored, however we decided only  
10 to consider those which could also be incorporated into a national programme. Among the  
11 possibilities were the use of MEMS caps (electronic bottle caps which would count bottle openings  
12 as a proxy for pill withdrawals and thus, adherence), pill counts (as conducted in clinical trials), and  
13 mHealth solutions in the form of short message service (SMS) messages. After discussing options  
14 with DoH partners, it was concluded that SMS as demonstrated by the ongoing MAMA Connect  
15 project (24), could be scaled up in a national programme, whereas other options would not be  
16 feasible.  
17  
18  
19  
20

21 A participatory process led by representatives of RHI's mHealth and Mental Health teams was  
22 undertaken through a series of workshops where themes around healthy living were developed  
23 followed by relevant SMS messages by peer educators. Both male and female sex worker peer  
24 educators worked in groups to create the messages which aimed to encourage healthy choices and  
25 wellness. These messages took into account the importance of avoiding inadvertent disclosure of  
26 HIV status to non-participants, and could still be used by the SWP after TAPS concluded. This process  
27 produced 110 SMS messages which would be sent once a week in succession to all participants who  
28 signed up for the service.  
29  
30

31 Experiences from early outreach activities directly influenced the messaging employed in each  
32 location, as well as educational materials used as part of supportive structures for generating  
33 demand and promoting awareness of the interventions. Messages focused on defining the  
34 interventions, addressing common myths and concerns around side effects, and providing  
35 information on efficacy and access.  
36  
37  
38

39 Peer educator and potential user feedback indicated that personal testimonies are highly valued by  
40 women in both locations, so these were included on the informational pamphlets. Trained peer  
41 educators also enrolled in the study were invited to become ambassadors for the interventions so  
42 that they could directly relate their experiences and dispel rumours about side effects.  
43  
44

45 Finally, additional supportive structures for the interventions and the women using them included  
46 the CAB, as well as tried and tested referral systems where we could ensure women would get  
47 additional support beyond the scope of our clinics as needed. One result of the consultations, as  
48 well, was the need for holistic sensitivity training around sex work which was conducted with every  
49 staff member, from cleaner to clinician, at both sites. Although a more passive support mechanism  
50 provided by a local community partner organisation, this was important in ensuring women felt  
51 welcome at the clinics.  
52  
53  
54  
55  
56  
57  
58  
59  
60

### Focus Group Discussions

FGDs were conducted in the Hillbrow and Pretoria CBD sites following site selection as the final set of activities in the formative research process. The FGDs aimed to test the core intervention design components for acceptability among potential users within the target communities. Four FGDs were held in each site with a total of 69 participants. The FGDs comprised important final steps in informing design as they explored a more focused community perspective of intervention acceptability on two main levels. One level consisted of data concerning logistics and preferences around physical delivery (location, preferred clinic times, frequency of visits and HIV testing), while the other level included social and structural level data where elements of stigma and socioeconomic norms (e.g. where the need for income might supersede health) that might affect uptake and use of PrEP and early ART were explored. Since this paper is focused on feasibility and early stages of acceptability, the end-stage formative data from the FGDs are presented in a companion paper (25).

### Discussion

In this paper, we have described in detail the formative research process and findings used to inform the design of the PrEP and early ART interventions implemented in TAPS. The inductive approach afforded a breadth of information around potential site locations, community and stakeholder perspectives, including potential barriers to successful implementation, and nuanced aspects of the urban sex work settings for considering how to ensure the interventions accomplished reach, accessibility, acceptability, and filled the needs of potential end-users. This process allowed for rapid and relevant consolidation of lessons learned to inform adaptations to the planned interventions.

Feasibility played a significant role in early decision making as to whether PrEP and early ART could be implemented, and acceptability from stakeholders ran in parallel. Questions of feasibility addressed site capacity, experience in delivering ARVs, experience with and access to FSWs, site locations related to FSW populations, and existing supply chains. Early acceptability was determined through consultations and engagement with potential end users in the community during outreach. Factors influencing feasibility and acceptability would not have been as comprehensively understood, such as the day to day clinic operation and the physical contexts and locales of sex work, without repeated site visits and time spent in the field. Continuous, in-depth interactions with the women themselves allowed the TAPS team to better understand sex workers' needs in addition to how interventions reach could be maximized. Additionally, identifying and addressing potential biases from providers and other stakeholders in the provision of the interventions was essential to avoid issues with maintaining permissions and supply chains as well as supportive services.

Generally, it would be expected that sex work populations and industries, with similar urban contexts and in relative geographical proximity, would be the same in both places and that interventions could be implemented uniformly in both locations. However, the formative research demonstrated just the opposite. While there were some similarities in how women live and work in terms of the types of locales and spaces, there were also significant differences. Sex work locales can be similarly categorized in the two cities, but the organization of these spaces and the make-up of them within Hillbrow and Pretoria is quite different in terms of women's personal safety and earning capability, for example. This translates into different sex worker populations and market dynamics and the need for adaptations to intervention design. Outreach strategies (groups versus one on one

1  
2  
3 discussions) and messaging channels (word of mouth, top down through brothel owners and pimps,  
4 or developing online contacts) were dictated directly by context and the expressed needs of the  
5 FSWs.  
6

7  
8 The formative research created awareness for the TAPS team around which stakeholders needed to  
9 be involved and engaged throughout the duration of the project, either through the CAB or in  
10 regular consultations, as well as the contexts in which women worked and lived and the need to be  
11 sensitive around FSW engagement to generate demand for PrEP and early treatment. Without the  
12 formative research, we would not have understood the importance of some messages over others  
13 from the perspectives of sex workers, the dynamics of sex work locales and their effects on risk and  
14 income, nor how flexibility around clinic visit scheduling would need to be taken into account.  
15  
16

## 17 **Conclusions**

18  
19 The lessons learned from this formative research process were directly applied to the design and  
20 implementation of the PrEP and early ART interventions delivered through the TAPS project. The  
21 inductive approach afforded the opportunity to adapt and include voices and perspectives, which  
22 might have otherwise been missed, and clarified the needs of the population as well as how to reach  
23 them appropriately. This research illustrated how sex work environments can vary, even when the  
24 settings are very similar, and therefore implementation of interventions is unlikely to be uniform  
25 across contexts. Formative research is critical in designing interventions, especially in new  
26 environments but also in well-known contexts. Including intensive stakeholder engagement in  
27 formative research will help to ensure that interventions are designed with feasibility and relevance  
28 for populations in mind.  
29  
30

## 31 **Declarations**

### 32 **Ethics approval and consent to participate**

33  
34 Formal ethical approval was provided by the Wits Human Ethics Research Committee (reference  
35 number: M131009) for the focus group discussions which included information testing and  
36 community engagement in the field to inform the development of discussion guides. All documents  
37 containing data were saved electronically in central folders with limited access to relevant project  
38 staff. No participant identifiers were included in any of the reports that were produced. With regard  
39 to other formative research elements, no individual data were collected or reported, and ethical  
40 principles of the Helsinki Declaration were strictly adhered to as part of this iterative and flexible  
41 approach.  
42  
43  
44

### 45 **Availability of data and materials**

46 All data generated or analysed during this study are included in this published article.  
47  
48

### 49 **Competing interests**

50 The authors have no declarations or conflicts of interest associated with this work.  
51  
52

### 53 **Funding**

54 This research was in part supported by funds from AIDS Fonds Netherlands (and the Bill and Melinda  
55 Gates Foundation (grant OPP1084416).  
56  
57

**Author Contributions**

RE developed the research agenda, designed data collection tools, participated in data collection, wrote and collected field notes, analysed the data, and drafted the paper. JM participated in data collection and analysed data. NM and MS participated in data collection. All authors reviewed and contributed to the paper.

**Acknowledgements**

We would like to thank the many women who participated in this formative research as well as the stakeholders and staff who engaged in helping us design the PrEP and early ART interventions for the TAPS Demonstration Project.

For peer review only

## References

1. UNAIDS. Good participatory practice: Guidelines for biomedical HIV prevention trials [Internet]. 2011 [cited 2016 Sep 28]. Available from: [http://www.unaids.org/en/resources/documents/2011/20110629\\_JC1853\\_GPP\\_Guidelines\\_2011%20OK](http://www.unaids.org/en/resources/documents/2011/20110629_JC1853_GPP_Guidelines_2011%20OK)
2. Tolley EE, Ulin PR, Mack N, Succop SM, Robinson ET. *Qualitative Methods in Public Health: A Field Guide for Applied Research*. John Wiley & Sons; 2016. 480 p.
3. Milat AJ, King L, Bauman AE, Redman S. The concept of scalability: increasing the scale and potential adoption of health promotion interventions into policy and practice. *Health Promot Int*. 2013 Sep 1;28(3):285–98.
4. Milat AJ, Bauman A, Redman S. Narrative review of models and success factors for scaling up public health interventions. *Implement Sci*. 2015;10:113.
5. World Health Organization. Scaling up projects and initiatives for better health: from concepts to practice [Internet]. 2016 [cited 2017 Apr 17]. Available from: [http://www.euro.who.int/\\_\\_data/assets/pdf\\_file/0004/318982/Scaling-up-reports-projects-concepts-practice.pdf](http://www.euro.who.int/__data/assets/pdf_file/0004/318982/Scaling-up-reports-projects-concepts-practice.pdf)
6. Fonner VA, Dalglish SL, Kennedy CE, Baggaley R, O'Reilly KR, Koechlin FM, et al. Effectiveness and safety of oral HIV preexposure prophylaxis for all populations. *AIDS Lond Engl*. 2016 Jul 31;30(12):1973–83.
7. World Health Organization. WHO | Guideline on when to start antiretroviral therapy and on pre-exposure prophylaxis for HIV [Internet]. 2015 [cited 2015 Oct 28]. Available from: <http://www.who.int/hiv/pub/guidelines/earlyrelease-arv/en/>
8. World Health Organization. PrEP demonstration projects: A framework for country level protocol development. A draft for review and discussion. 2013.
9. Cremin I, Alsallaq R, Dybul M, Piot P, Garnett G, Hallett TB. The new role of antiretrovirals in combination HIV prevention: a mathematical modelling analysis. *AIDS*. 2013 Jan;27(3):447–58.
10. Gomez GB, Borquez A, Case KK, Wheelock A, Vassall A, Hankins C. The Cost and Impact of Scaling Up Pre-exposure Prophylaxis for HIV Prevention: A Systematic Review of Cost-Effectiveness Modelling Studies. *PLoS Med*. 2013 Mar 12;10(3):e1001401.
11. Hallett TB. Priorities across the continuum of care: modelling the impact of interventions on mortality and HIV transmission. In Vancouver, Canada; 2015.
12. Rees H, Beksinska ME, Dickson-Tetteh K, Ballard RC, Htun Y. Commercial sex workers in Johannesburg: risk behaviour and HIV status. *South Afr J Sci*. 2000 Jun;96:283–4.
13. Williams BG, Taljaard D, Campbell CM, Gouws E, Ndhlovu L, Van Dam J, et al. Changing patterns of knowledge, reported behaviour and sexually transmitted infections in a South African gold mining community. *AIDS Lond Engl*. 2003 Sep 26;17(14):2099–107.
14. Ramjee G, Karim SS, Sturm AW. Sexually transmitted infections among sex workers in KwaZulu-Natal, South Africa. *Sex Transm Dis*. 1998 Aug;25(7):346–9.



15. UCSF, Anova Health Institute, Wits RHI. South African Health Monitoring Survey (SAHMS): An Integrated Biological and Behavioural Survey among Female Sex Workers, South Africa 2013 – 2014. San Francisco: UCSF; 2015.
16. The Discovery of Grounded Theory; Strategies for Qualitative... : Nursing Research [Internet]. [cited 2014 Jun 2]. Available from: [http://journals.lww.com/nursingresearchonline/Fulltext/1968/07000/The\\_Discovery\\_of\\_Grounded\\_Theory\\_\\_Strategies\\_for.14.aspx](http://journals.lww.com/nursingresearchonline/Fulltext/1968/07000/The_Discovery_of_Grounded_Theory__Strategies_for.14.aspx)
17. Gomez GB, Eakle R, Mbogua J, Akpomiemie G, Venter WDF, Rees H. Treatment And Prevention for female Sex workers in South Africa: protocol for the TAPS Demonstration Project. *BMJ Open*. 2016 Sep 1;6(9):e011595.
18. Sibanyoni M. Sex in the Cities: Comprehensive healthcare for sex workers. In 2015. Available from: [http://www.saaids.co.za/Presentations2/Wednesday%2010%20June%202015/Hall%206/Setellite%20session%2014h00\\_Wits%20RHI/pdf/SWMC%20SAAIDS%20Presentation.pdf](http://www.saaids.co.za/Presentations2/Wednesday%2010%20June%202015/Hall%206/Setellite%20session%2014h00_Wits%20RHI/pdf/SWMC%20SAAIDS%20Presentation.pdf)
19. Braun V, Clarke V. Using thematic analysis in psychology. *Qual Res Psychol*. 2006 Jan;3(2):77–101.
20. Eakle R, Manthata G, Stadler J, Mbogua J, Sibanyoni M, Venter WDF, et al. Preparing for PrEP & Immediate Treatment: Focus Group Discussions in Advance of a Demonstration Project in South Africa. In Cape Town, South Africa; 2014 [cited 2016 Jun 22]. Available from: <http://online.liebertpub.com/doi/full/10.1089/aid.2014.5606.abstract>
21. UNAIDS. Sex workers' hopes and fears for HIV pre-exposure prophylaxis: recommendations from a UNAIDS consultation meeting. Johannesburg, South Africa: Wits RHI; 2014.
22. AVAC. Engagement For Impact - Home [Internet]. [cited 2017 May 4]. Available from: <https://www.engagementforimpact.org/toolkit/>
23. World Health Organization, United Nations Population Fund, Joint United Nations Programme on HIV/AIDS, Global Network, of Sex Work Projects, The World Bank. Implementing comprehensive HIV/STI programmes with sex workers: practical approaches from collaborative interventions. Geneva: World Health Organization; 2013.
24. Coleman J, Bohlin KC, Thorson A, Black V, Mechael P, Mangxaba J, et al. Effectiveness of an SMS-based maternal mHealth intervention to improve clinical outcomes of HIV-positive pregnant women. *AIDS Care*. 2017 Jan 20;1–8.
25. Robyn Eakle, Adam Bourne, Judie Mbogua, Nyaradzo Mutanha, Helen Rees. Exploring acceptability of PrEP and early treatment among female sex workers in advance of the TAPS Demonstration Project. submission under review;

1  
2  
3 *Figure 1. The formative research process and timeline to design the PrEP and early ART interventions for TAPS.*  
4

5 Abbreviations: ppts = participants; SMS = Short Message System; FGDs = Focus Group Discussions  
6  
7  
8  
9  
10  
11  
12  
13  
14  
15  
16  
17  
18  
19  
20  
21  
22  
23  
24  
25  
26  
27  
28  
29  
30  
31  
32  
33  
34  
35  
36  
37  
38  
39  
40  
41  
42  
43  
44  
45  
46  
47  
48  
49  
50  
51  
52  
53  
54  
55  
56  
57  
58  
59  
60

For peer review only

1  
2  
3  
4  
5  
6  
7  
8  
9  
10  
11  
12  
13  
14  
15  
16  
17  
18  
19  
20  
21  
22  
23  
24  
25  
26  
27  
28  
29  
30  
31  
32  
33  
34  
35  
36  
37  
38  
39  
40  
41

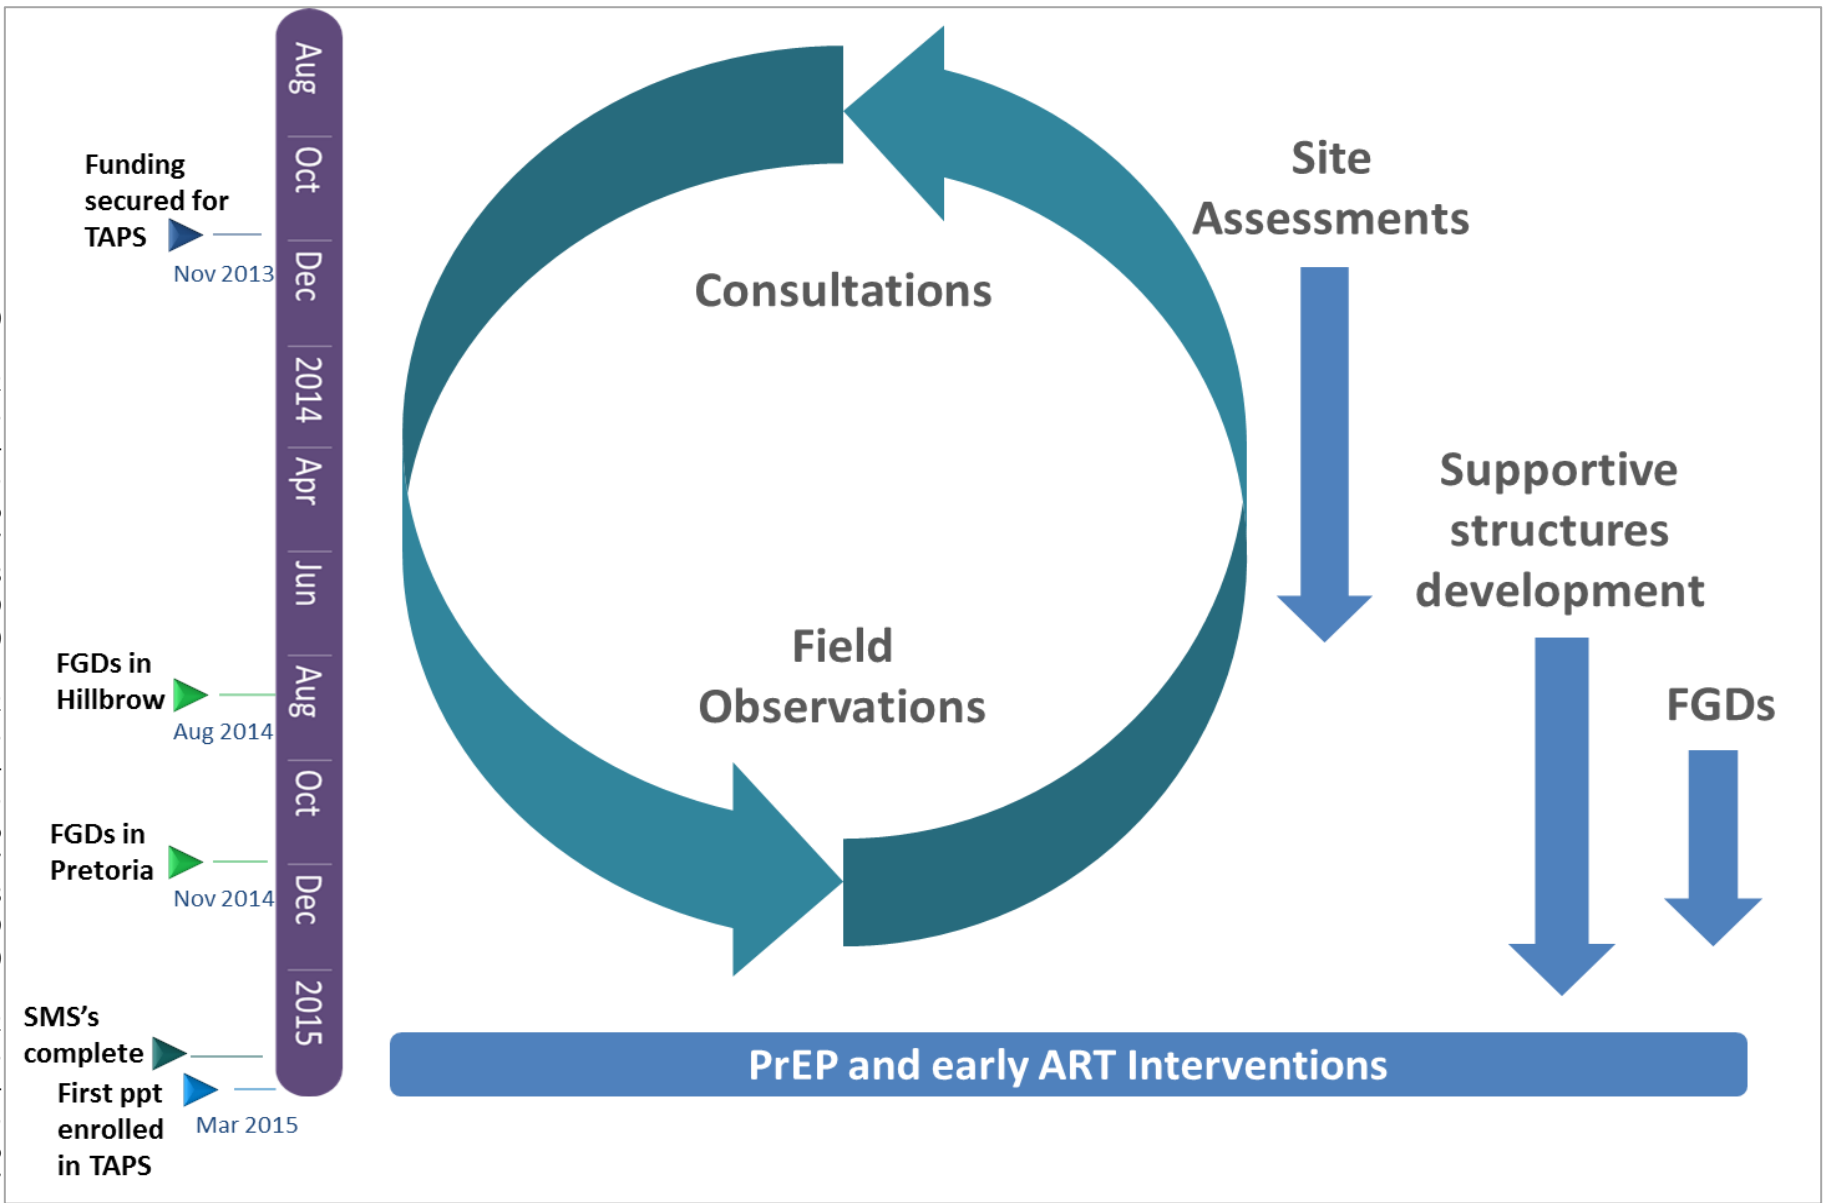

# BMJ Open

## Designing PrEP and early HIV treatment interventions for implementation among female sex workers in South Africa: developing and learning from a formative research process

|                                 |                                                                                                                                                                                                                                                                                                                                                                                                                                                                                                                                                                                                    |
|---------------------------------|----------------------------------------------------------------------------------------------------------------------------------------------------------------------------------------------------------------------------------------------------------------------------------------------------------------------------------------------------------------------------------------------------------------------------------------------------------------------------------------------------------------------------------------------------------------------------------------------------|
| Journal:                        | <i>BMJ Open</i>                                                                                                                                                                                                                                                                                                                                                                                                                                                                                                                                                                                    |
| Manuscript ID                   | bmjopen-2017-019292.R1                                                                                                                                                                                                                                                                                                                                                                                                                                                                                                                                                                             |
| Article Type:                   | Research                                                                                                                                                                                                                                                                                                                                                                                                                                                                                                                                                                                           |
| Date Submitted by the Author:   | 28-Feb-2018                                                                                                                                                                                                                                                                                                                                                                                                                                                                                                                                                                                        |
| Complete List of Authors:       | Eakle, Robyn; Wits Reproductive Health and HIV Institute, ; London School of Hygiene and Tropical Medicine, Social and Environmental Health Research<br>Mutanha, Nyaradzo; Wits Reproductive Health and HIV Institute<br>Mbogua, Judie<br>Sibanyoni, Maria ; Wits Reproductive Health and HIV Institute<br>Bourne, Adam; La Trobe University, Australian Research Centre for Sex, Health & Society<br>Gomez, Gabriela; London School of Hygiene and Tropical Medicine,<br>Venter, WD Francois; University of the Witwatersrand, Wits RHI<br>Rees, Helen; University of the Witwatersrand, Wits RHI |
| <b>Primary Subject Heading</b>: | HIV/AIDS                                                                                                                                                                                                                                                                                                                                                                                                                                                                                                                                                                                           |
| Secondary Subject Heading:      | Health services research, Public health, Qualitative research, Research methods                                                                                                                                                                                                                                                                                                                                                                                                                                                                                                                    |
| Keywords:                       | Sex work, HIV prevention, pre-exposure prophylaxis, formative research                                                                                                                                                                                                                                                                                                                                                                                                                                                                                                                             |
|                                 |                                                                                                                                                                                                                                                                                                                                                                                                                                                                                                                                                                                                    |

SCHOLARONE™  
Manuscripts

1  
2  
3 **Designing PrEP and early HIV treatment interventions for implementation among female sex**  
4 **workers in South Africa: developing and learning from a formative research process**  
5

6 Robyn Eakle<sup>\*1,2,3</sup>, Nyaradzo Mutanha<sup>1</sup>, Judie Mbogua<sup>1</sup>, Maria Sibanyoni<sup>1</sup>, Adam Bourne<sup>4</sup>, Gabriela  
7 Gomez<sup>1,2</sup>, Francois Venter<sup>1</sup>, Helen Rees<sup>1</sup>  
8  
9

10  
11 <sup>1</sup>Wits Reproductive Health and HIV Institute, Faculty of Health Sciences, University of the  
12 Witwatersrand, Johannesburg, South Africa

13 <sup>2</sup>Social and Mathematical Epidemiology (SaME), Department of Global Health and Development  
14 London School of Hygiene and Tropical Medicine, UK

15 <sup>3</sup>Sigma Research, Department of Social and Environmental Health Research, London School of  
16 Hygiene and Tropical Medicine, UK

17 <sup>4</sup>Australian Research Centre for Sex, Health & Society, La Trobe University, Melbourne, Australia.  
18  
19  
20  
21

22 \*Corresponding author:

23 Robyn Eakle

24 Wits Reproductive Health & HIV Institute

25 University of the Witwatersrand,

26 Hillbrow Health Precinct

27 22 Esselen Street

28 Hillbrow, 2001

29 Johannesburg

30 South Africa

31 e: reacle@wrhi.ac.za  
32  
33  
34

35 Author emails:

36 Robyn Eakle [robyn.eakle@lshtm.ac.uk](mailto:robyn.eakle@lshtm.ac.uk); reacle@wrhi.ac.za

37 Nyaradzo Mutanha [missnyarie@gmail.com](mailto:missnyarie@gmail.com)

38 Judie Mbogua [judie.mbogua@gmail.com](mailto:judie.mbogua@gmail.com)

39 Maria Sibanyoni [msibanyoni@wrhi.ac.za](mailto:msibanyoni@wrhi.ac.za)

40 Adam Bourne [A.Bourne@latrobe.edu.au](mailto:A.Bourne@latrobe.edu.au)

41 Gabriela Gomez [Gabriela.Gomez@lshtm.ac.uk](mailto:Gabriela.Gomez@lshtm.ac.uk)

42 Francois Venter [fventer@wrhi.ac.za](mailto:fventer@wrhi.ac.za)

43 Helen Rees [hrees@wrhi.ac.za](mailto:hrees@wrhi.ac.za)  
44  
45  
46  
47

48 Word count: 5,748

49 Number of figures/tables: 3

50 References: 37  
51  
52

53 Key words: HIV prevention, biomedical prevention products, pre-exposure prophylaxis (PrEP), sex  
54 work, formative research  
55  
56  
57

## Abstract

### Objectives

The objective of this research was to design relevant, tailored oral pre-exposure prophylaxis (PrEP) and early antiretroviral (ART) interventions for female sex workers (FSWs) in South Africa. This paper examines the methods, process, and outcomes of employing an inductive approach to formative research exploring intervention feasibility and acceptability.

### Setting

Research was conducted in several sex work-related settings including five sites in and around clinics, and stakeholder offices.

### Participants

Participants in this research included stakeholders, experts in the field, and FSWs. This included at least 25 separate engagements, 14 local organizations, and eight focus group discussions (FGDs) with 69 participants, in addition to ad hoc meetings.

### Results

The first set of outcomes consisted of five selected methods: 1) stakeholder consultations; 2) site assessments and selection; 3) field observations and mapping; 4) development of supportive structures to encourage retention and intervention adherence; 5) FGDs conducted with FSWs to explore specifics of acceptability. In terms of feasibility, two sites were selected in central Johannesburg and Pretoria out of five considered. The urban site contexts varied, necessitating adjustments to intervention implementation. There was overall support for PrEP and early ART from stakeholders and FSWs. Concerns included potential issues with adherence to PrEP (and early ART), possible reduction in condom use, resistance to ARVs, and burden on scarce resources. These concerns indicated where special attention should be focused on education, messaging, and programming, as well as development of supportive structures.

### Conclusions

The inductive approach allowed for a wide range of perspectives, defining population needs and accessibility. This research illustrated how similar sex work environments can vary and how implementation of interventions may not be uniform across contexts. Lessons learned in details could assist in future project designs and implementation of new interventions where feasibility, social and cultural factors affecting acceptability must be considered.

### Strengths and Limitations

- This formative research process drew on principles of grounded theory allowing for an inductive, iterative approach to drive the selection of the most appropriate methods for gathering a broad spectrum of data aimed at intervention design.
- Five methods were selected, providing an array of data for decision making and intervention design.
- The final selected project sites were chosen for their nearer uniformity than for diversity; results may not translate beyond this study, however lessons learned will be applicable.

## Introduction

Several guidance documents highlight the need for formative research both when preparing for larger studies and to design the implementation of new public health interventions (1,2). Formative research includes the assessment of feasibility, reach, acceptability, and need of populations to strengthen planned uptake and use of interventions. In particular, formative research aims to ensure the capacity for physical implementation and responsiveness to cultural, social, economic and physical environments (3–5). However, this phase of work is frequently not reported in detail and important lessons learned may be lost. This paper describes the detailed decision making and conduct of formative research undertaken to design two new HIV prevention and treatment interventions delivered to female sex workers (FSWs) in a demonstration project in South Africa.

Oral pre-exposure prophylaxis (PrEP) using antiretroviral (ARV) drugs given to HIV-negative individuals to prevent HIV infection, has been shown to be efficacious in multiple clinical trials (6). In addition, HIV treatment can be given to HIV-positive people as soon as they are diagnosed, called test and treat or early antiretroviral treatment (ART). PrEP and early ART are now recommended in the standard of HIV care by the World Health Organization (WHO) (7). These two interventions have also been listed as priorities for operational research. When the study described here was in its infancy, PrEP and early ART were being considered for potential integration into the standard of care in South Africa, which still experiences one of the world's largest HIV epidemics (8). While South Africa has a generalised epidemic, key populations at highest risk for HIV, such as sex workers, have been in need of prioritised and tailored HIV prevention, treatment and care (9).

Demonstration projects were recommended by the WHO in 2013 to answer implementation questions relating to feasibility and acceptability of oral PrEP (10). The call prioritised research for key populations such as sex workers, who have been shown by mathematical modelling to be ideal candidates for PrEP, especially in combination with early antiretroviral (ART) treatment for HIV-positive people (11–13). In the previous decade, HIV prevalence among female sex workers in South Africa was found to be between 46% and 69% (14–16), with recent research estimating a prevalence of 72% in the greater Johannesburg area (17).

Before pursuing implementation research on PrEP and early ART delivery in South Africa, formative research was needed to first shape the interventions. The research presented here employed a comprehensive and inductive approach to formative research that explored feasibility and acceptability of PrEP and early ART, with a view to informing and executing the targeted interventions. This work formed the basis for the design of the TAPS (Treatment And Prevention for Sex workers) Demonstration Project, the purpose of which was to demonstrate how these two interventions could be implemented among FSWs, and inform national scale-up in South Africa (18). We explore and illustrate the approach and process undertaken to define and carry out the formative research, describe how the results informed the overall design of the oral PrEP and early ART interventions for TAPS, and reflect on challenges and successes encountered during the process.

## Methods

This formative research took place between August 2013 and March 2015, and employed an inductive approach based on the principles of grounded theory (19). An inductive approach to data collection is iterative in nature and, rather than seeking to test a hypothesis or assumption, allows findings to emerge from the bottom up. Findings from one stage of data collection can inform decisions about the selection of subsequent methods and identify new, perhaps unanticipated avenues for data collection to help address the key research questions. Grounded Theory (20) is a qualitative research approach that operates inductively and can be used to guide robust data collection and analysis in an iterative manner.

Our overall, initial goal was to implement and evaluate oral PrEP and early ART interventions in the TAPS project integrated into a pre-defined service delivery programme for FSWs. To arrive at this goal we faced several important questions to address in the formative phase, including:

- 1) was there support from stakeholders to test the implementation of PrEP and early ART among FSWs;
- 2) where could/should the interventions be delivered, how, and by whom;
- 3) how should FSWs be engaged in the project (both in the formative phase and in the active study);
- 4) what structures should be included to support delivery; and,
- 5) how did women conceive of acceptability as users of the interventions (and therefore affect demand)?

Since formative research can take many forms including exploring feasibility of supportive structures and logistics for physical delivery of the intervention, as well as exploring the acceptability among populations in different contexts (2), it was important to use an inductive approach to selecting methods driven by the above questions and findings as they emerged. At the beginning of this process, there was a wide original scope within which to consider a large range of logistical possibilities (e.g. site locations, adherence support structures, community capacity for involvement) for the design and implementation of the interventions, also an important reason not to pre-define all methods which would have limited the scope of design consideration.

Additionally, at the start of the formative work, we knew that the overall aims of the larger TAPS Demonstration Project would be to explore whether FSWs will take up early ART or PrEP, whether the service delivery mechanism was capable of handling the increase in resource needs that might be required, and what the implications of the implementation of these interventions might be, including overall costs should the interventions be scaled up (18). TAPS was part of the Wits RHI Sex Worker Programme (SWP), a comprehensive health and well-being programme for sex workers running for over 20 years in Johannesburg and other provinces in South Africa (21). In this regard, the main purpose of the formative research was to develop interventions which had the best possible potential for success as well as for evaluation. This premise drove the formative research process, and early on defined the imperative to ensure that sex workers were included throughout.

Decision making about which methods, sites, and stakeholders with whom to engage at each step was guided by feedback from community members and the data collected. Principles from the Good



1  
2  
3 Participatory Practice Guidelines (GPP) developed by UNAIDS and AVAC were also followed,  
4 promoting multi-level stakeholder engagement as a core component of research (1). In line with  
5 these guidelines, a range of stakeholders were engaged, including sex workers, sex work related  
6 organizations, and the Department of Health (DoH), further described in the results section.  
7

8  
9 The selected research activities were chosen according to the evolving data and eventually fell into  
10 five core categories of methods: consultations, site assessments, field observations and mapping,  
11 development of supportive structures and messaging, and FGDs. These methods generated three  
12 primary sources of data which informed the design of the interventions: 1) recorded minutes and  
13 reports of meetings with stakeholders; 2) notes from field observations collected during  
14 engagement with sex worker communities and the environments within which they work, as well as  
15 the process of hotspot mapping, experiences at potential clinic sites, and through the development  
16 of supportive structures; and, 3) transcripts of FGDs. Outcomes included the chosen formative  
17 research methods, the lessons learned from data collection, and the final design of the interventions  
18 as well as relevant data collection and monitoring tools and supportive structures. These data were  
19 collected by a combination of researchers, sex worker peer educators, and clinical staff.  
20  
21

### 22 23 **Data analysis**

24 Data were continuously collected and analysed using an inductive, Grounded Theory approach over  
25 18 months. Field notes, meeting notes, written reports, and FGD transcripts, were reviewed as  
26 activities occurred to identify key themes for further exploration and to define next steps. In this  
27 regard, this approach employed a continuous review of data collected in a rolling fashion where the  
28 researchers would note significant pivot points in learning to then decide on the next step in  
29 research until final decisions on project design aspects had been made. For example, the decision to  
30 disqualify a site could be made due to low accessibility of the population only discovered during  
31 onsite exploration, and then that decision would be immediate and final leading to more attention  
32 paid to the next step at other sites. Site selection and staff recruitment represented the end of the  
33 first major phase of formative research. Community mobilization was then focused at the selected  
34 sites where testing of messaging, development of supportive systems, and development and testing  
35 of potential data collection tools continued led by clinic staff, peer educators, and potential end  
36 users.  
37  
38  
39  
40

41 FGDs were conducted at each of the final selected sites in multiple languages to suit the participants  
42 and analysed following principles of thematic analysis (22), concentrating on themes originating  
43 from the field research incorporated in the FGD guides as well as allowing for organic themes to  
44 emerge during the discussions. Further details of the methods and results from the FGDs are  
45 presented in a companion paper (23).  
46  
47  
48

### 49 **Results**

50 As this is primarily a methods paper, results are presented in five sections according to the chosen  
51 methods as products of the grounded/inductive approach. Sections also relate to the questions  
52 addressed by the methods, how the methods were undertaken, and lessons learned influencing the  
53 design and execution of the interventions.  
54  
55  
56  
57  
58  
59  
60

These five methods were: 1) stakeholder consultations; 2) site assessments and selection; 3) field observations and mapping; 4) development of supportive structures to encourage retention and intervention adherence; 5) FGDs conducted with potential end-users to explore specifics of acceptability. These are presented in Table 1 which maps methods to the research questions and data types.

Additionally, a diagram of the methods and the timeline during which they occurred is shown in Figure 1. This figure illustrates how some activities were continuous and others discrete, as research is very rarely a clean, linear process and in this case the data were continually informing the decision making.

Table 1. Formative research methods and their attributes mapped to research questions

| Research Question                                                                                                 | Method(s)                                                                                       | Data Type                                                 | Stage/Aspect in process                                                            |
|-------------------------------------------------------------------------------------------------------------------|-------------------------------------------------------------------------------------------------|-----------------------------------------------------------|------------------------------------------------------------------------------------|
| 1. Was there support from stakeholders to test the implementation of PrEP and early ART among FSWs?               | Consultations, Site Assessments, FGDs                                                           | Meeting reports and minutes, field notes, FGD transcripts | First step, continuous throughout process                                          |
| 2. Where could/should the interventions be delivered, how, and by whom?                                           | Consultations, Site Assessments, Field Observations                                             | Meeting reports and minutes, field notes                  | Second step, continuous until sites finalized                                      |
| 3. How should FSWs be engaged in the project (both in the formative phase and in the active study)?               | Consultations, Field Observations                                                               | Meeting reports and minutes, field notes                  | Incorporated across all steps                                                      |
| 4. What structures should be included to support delivery?                                                        | Consultations, Site Assessments, Field Observations, Development of supportive structures, FGDs | Meeting reports and minutes, field notes, FGD transcripts | Concluded in later steps of the process, but taken from lessons learned throughout |
| 5. How did women conceive of acceptability as users of the interventions (and therefore affect potential demand)? | Consultations, Site Assessments, Field Observations, FGDs                                       | Meeting reports and minutes, field notes, FGD transcripts | A component of early phases, but more discretely determined in final steps         |

[Insert Figure 1. Formative Research Process Graphic]

### Stakeholder Consultations

This method sought to answer the question relating to support for the TAPS interventions from stakeholders, but also resulted in addressing some of the other questions around engaging FSWs, potential locations for the research sites, and concepts of acceptability. Research began with this activity in order to ascertain a baseline of stakeholder knowledge of and attitudes towards PrEP and early ART, as well as attitudes towards sex workers, which denoted initial levels of acceptability for the interventions in this population. We initially conducted three community consultations in 2013 with a total of 81 attendees from sex worker communities and partner organizations in Hillbrow and

1  
2  
3 Ngodwana, where a new sex worker clinic was in the initiation phase. Additionally, an international  
4 consultation of 38 attendees was held in Hillbrow in 2013 and included representatives from sex  
5 work communities and organizations, funders, UNAIDS and WHO (24). These consultations allowed  
6 for mapping of organizations and individuals from which to move into the next phase of  
7 consultations and formative research.  
8  
9

10 Smaller meetings were held with local DoH representatives in Johannesburg, Mpumalanga,  
11 Phongolo, and Pretoria to develop partnerships and potential support agreements for the TAPS  
12 project. Updates on, and engagement with, the plans for the TAPS interventions continued at  
13 quarterly and other scheduled meetings with local DoH and partners. Parallel meetings were also  
14 held with National DoH and the South African National AIDS Council (SANAC). These meetings also  
15 informed the site selection in terms of support and local capacity.  
16  
17

18 Sex workers at each potential site, driven largely by peer educators, helped to identify community  
19 organizations to engage for additional perspectives. Stakeholder engagement, both formal and  
20 informal, was tracked using an engagement tracking tool (25) developed by the HIV prevention  
21 advocacy group, AVAC. Separate meetings were held with 14 different organizations, as well as a  
22 number of sensitization trainings provided by the TAPS team and SWEAT to local providers and DoH  
23 officials. These added up to at least 25 meetings; however many additional ad hoc, less formal  
24 engagement occurred as well during this time which was not possible to definitively quantify.  
25  
26  
27

28 Feedback from the consultations pointed to varying degrees of support and acceptability depending  
29 on local capacity to take on new interventions and scepticism towards the interventions, and  
30 particularly PrEP. Stakeholders affirmed that implementing PrEP and early ART together would  
31 promote synergistic delivery, as well as potentially normalize the use of ARVs in providing options to  
32 both HIV-negative and positive sex workers. However, concerns were voiced about adherence to  
33 PrEP (and sometimes early ART), as well as the potential for reduction in condom use, increases in  
34 risk of resistance to ARVs, and burden on scarce resources. These concerns indicated where special  
35 attention should be focused, such as providing evidence about possible resistance to PrEP and  
36 strategies for and the philosophy around supporting adherence and condom use, both in early  
37 messaging and education for sex workers, implementing and policy partners, as well as where to  
38 focus messaging and monitoring when implementing the interventions in TAPS.  
39  
40  
41  
42

43 Finally, consultations were also used to identify potential community advisory board (CAB)  
44 members. Meetings were held with individuals expressing interest in participation to inform them  
45 about the study and the CAB. These discussions continued until a CAB with up to 12 members (set  
46 as the limit for the group which might fluctuate in attendance over time) was established. The CAB  
47 incorporated representatives from the local police force, sex worker advocacy organizations, sex  
48 workers themselves, and religious organizations. A total of five CAB meetings were held before TAPS  
49 was launched in March 2015. The CAB became both a result of the formative research and another  
50 source of consultation. The CAB also functioned as a supportive structure as members helped spread  
51 knowledge of the interventions and the TAPS project, as well as lobby for expansion of the  
52 interventions to more sites, populations, and organizations.  
53  
54  
55

### 56 **Site assessments and selection**

57  
58  
59  
60

1  
2  
3 Site selection primarily addressed the question of where the project could/should be implemented,  
4 and much was learned in this process which is further reported in the field observations. Finalizing  
5 site selection was a critical step in moving forward with the design of the interventions. We aimed to  
6 select 2-3 sites (according to funding and capacity for managerial oversight) with the following  
7 population criteria: access to a large number of FSWs (>200 according to early sample size  
8 calculations (18)), populations with a relatively balanced proportion of HIV-negative and HIV-positive  
9 women, and accessibility of clinics. Physical feasibility of the clinics to implement the interventions  
10 was assessed through reviews of space, clinical and laboratory infrastructure, required site  
11 permissions and approvals, and supply chain mechanisms. Support for the interventions was  
12 explored with the local DoH and sex worker communities, as well as identification of logistical gaps.  
13 Site visits, hot spot mapping, and site assessments were conducted to determine the feasibility of  
14 delivering PrEP and early ART.  
15  
16  
17

18 Assessments were conducted in four of the original nine Wits RHI SWP sites plus Pretoria as a new  
19 site. The other five sites did not meet initial criteria (e.g. size of FSW population, clinic feasibility).  
20 These five sites featured existing SWP clinics already delivering ARVs per national guidelines or had  
21 plans to implement new clinics, interest and support from the local communities, and potential  
22 access to a large group of FSWs in areas where HIV prevalence was high. This information came from  
23 the initial consultations and community engagement and mapping, as well as internal programme  
24 data. These sites were located in: Ngodwana (rural village in Mpumalanga province), Phongolo (rural  
25 trucking site in KwaZulu Natal province), Hillbrow (central, inner-city Johannesburg), City Deep (peri-  
26 urban trucking site immediately south of Johannesburg), and the Pretoria central business district  
27 (CBD), the latter three of which were located in Gauteng province. Figure 2 illustrates the sites  
28 situated across several provinces in South Africa.  
29  
30  
31

32  
33 [Insert Figure 2. Map of TAPS and Wits RHI SWP Sites in South Africa]  
34

35 Following the site assessments, three sites were eliminated. Ngodwana was eliminated due to lack  
36 of infrastructure and building delays, as well as lack of local support. Although there was initial  
37 interest, the implementation of the interventions potentially conflicted with limited resources and  
38 competing priorities in the area. The rural sex worker community in that location do not self-identify  
39 as sex workers which would have created challenges in being able to compare formal sex workers  
40 who self-identify and those who do not as part of project evaluation. The prevalence of HIV in  
41 Ngodwana was estimated locally to be around 75-80% in a relatively small village of <300 people  
42 mostly made up of sex workers, which also would have made it difficult to implement PrEP.  
43  
44  
45

46 City Deep was eliminated due to low clinic attendance, as well as the highly transient nature of the  
47 sex worker populations. Most of the women attending that clinic arrived in the trucks coming from  
48 all over South Africa as well as neighbouring countries, which would have made commitment to  
49 regular, repeat clinic visits difficult. The Phongolo site, located next to the Swaziland border, was  
50 also eliminated as women tended to move in and out of the town and were away for as many as  
51 three to four months at a time.  
52  
53

54 As a result, the clinics in Hillbrow and Pretoria were selected as the two TAPS sites. Hillbrow was  
55 chosen because of the long-standing Wits RHI sex worker clinic which maintains strong ties to a large  
56  
57

1  
2  
3 community of sex workers and their managers (brothel owners, 'pimps'). At the time, HIV  
4 prevalence was estimated locally at around 50%. The clinic is situated in an area with a high  
5 concentration of brothels and street based locations within walking distance, but also with a number  
6 of surrounding outreach areas in the Johannesburg CBD, Yeoville, Jeppe, and Rosettenville. For these  
7 reasons, this site was considered "low-hanging fruit" for new intervention implementation, due to  
8 the substantial population of women at risk of HIV infection and as a location with solid community  
9 support.  
10

11  
12 In Pretoria, tailored sex worker services and relationships with the community were new at the  
13 Sediba Hope clinic in the heart of the CBD, however there was strong support from the local DoH  
14 and expressed need from the sex workers themselves. The newness of such interventions in the area  
15 posed a challenge as to whether PrEP and early ART could be implemented within a new sex worker  
16 clinic in a new setting, and what it would take to do so, however this was determined to be a  
17 potential strength (and weakness) for implementing these new interventions in a new clinic and the  
18 lessons that could be learned.  
19  
20

### 21 22 **Field Observations and Mapping**

23 Field observations and mapping elicited information relating to the how of intervention  
24 implementation, engaging the community, and acceptability. Data were collected through a variety  
25 of engagements in the field centring on community mobilization activities, accruing organically in  
26 scope, as discussions and interactions within the communities pointed to additional contacts for  
27 engagement. Each point of contact presented opportunities for new consultations and/or locations  
28 to conduct outreach. Feedback from the community about potentially offering PrEP and early ART  
29 was collected during peer and clinical staff outreach and workshops, which also aimed to elicit  
30 values related to acceptability and ultimately generate demand for the interventions.  
31  
32  
33

34 The core of the community mobilization and exploration work was conducted through outreach. In  
35 this case, outreach consisted of health education, condom promotion use, and a spectrum of  
36 services provision from HIV testing and counselling to full clinical services in mobile units in locations  
37 accessible to the population (26). TAPS staff accompanied staff and peer educators from the SWP  
38 during their normal outreach activities to probe the local sex worker populations for any knowledge  
39 or perceptions of PrEP and early ART, as well as start to introduce related information. This resulted  
40 in learning more about where and how sex workers operated and how they interacted with health  
41 services, informing viability of given sites. We found high interest in and a general cursory  
42 understanding of the interventions, particularly in the Johannesburg Hillbrow area where some  
43 women had been previously engaged in research studies around PrEP and microbicides. These  
44 engagements led us to further think about which supportive structures would be needed and how  
45 messages would have to define the differences between PrEP and early ART. Additionally, as core  
46 feature of the SWP, interventions were designed around outreach which was identified as a central  
47 aspect critical to generating demand and recruiting participants for TAPS.  
48  
49  
50  
51

52 Hot spot mapping was conducted during outreach to determine the number of FSWs working near  
53 the potential sites as well as their working hours which would allow us to focus community  
54 education and recruitment efforts. The methods utilized and built on the results produced by the  
55 South African Health Monitoring Study (SAHMS), which drew on multiple mapping methods  
56  
57  
58  
59  
60

1  
2  
3 including time-location and the “wisdom-of-crowds” (17). This activity in combination with prior  
4 experience derived through the SWP, revealed that time and location of sex work is driven largely by  
5 client availability. Peak working hours were recorded in each site as critical data dictating when  
6 women could be free to attend the clinics. These varied dramatically from site to site, where working  
7 hours may begin at 10 am in some places, and much later in the afternoon in others. Local languages  
8 at each site were also documented so that study materials could be translated and appropriate staff  
9 hired.  
10

11  
12 One of the most important aspects of learning was around the sex work environment, which was  
13 somewhat known from our engagement with the larger SWP, but important for staff to see and  
14 understand first hand. We assumed, according to previous knowledge, three general categories of  
15 sex work locales within the two urban settings. Brothels or hotels usually offer alcohol and  
16 entertainment, including combinations of music, dancing, and bar games. Many are former or  
17 existing hotels while others are simply bars with backrooms. Security protecting sex workers from  
18 violent clients is common in these establishments. Secondly, street-based sex work occurs in high  
19 traffic areas where sex workers pick up clients, and either join them in vehicles or have sex in a  
20 nearby location such as an alley. The third category comprises the “dark places” (IsiZulu:  
21 *mnyamandawo*), informal locations in empty lots or other uninhabited/unoccupied buildings or  
22 areas where sex workers build rudimentary structures in which to work.  
23  
24  
25

26  
27 However, in both cities there is also a fourth, more hidden sex work market found online. Awareness  
28 of the online market was generated through conversations with sex workers during outreach and  
29 through peer educators, some of whom had online pages and knew of others with similar  
30 arrangements. Sex work conducted online usually involves regular clients met through a web-based  
31 connection, where business is conducted out of private spaces (personal homes, private spaces run  
32 by an owner, upscale hotels or clubs). This population was engaged later in the process as they are  
33 less visible to implementers and researchers, and difficult to build relationships with given their  
34 desire for anonymity.  
35  
36

37  
38 Finally, earning ability, directly associated with the type of sex work locale, was identified as an  
39 important aspect of being able to take time off to come to the clinic even for short periods of time.  
40 Sex workers operating in brothels tend to be able to charge higher rates for sex, usually between  
41 R50 and R150 (about 3-10 USD), depending on the status of the brothel and the cost of room rental  
42 incurred by the sex workers. On the street, rates are around R50, and in a dark place sex can be R20-  
43 30 (about 1.30-2 USD). Making less money meant more difficulty in taking time away from work to  
44 attend the clinic for regular PrEP or treatment related appointments.  
45  
46

#### 47 **Development of supportive structures and messaging**

48 During consultations, a number of stakeholders provided views on possible components to be  
49 incorporated in the intervention design, in particular supportive structures. Supportive structures  
50 are generally anything outside of the standard of care which act to promote intervention uptake and  
51 use. Mechanisms for supporting intervention adherence and retention in care were explored,  
52 however we decided only to consider those which could be incorporated into a national programme.  
53 Among the possibilities were the use of MEMS caps (electronic bottle caps which would count bottle  
54 openings as a proxy for pill withdrawals and thus, adherence), pill counts (as conducted in clinical  
55  
56  
57

1  
2  
3 trials), and mHealth solutions in the form of short message service (SMS) messages. After discussing  
4 options with DoH partners, it was concluded that SMS, as demonstrated by the ongoing MAMA  
5 Connect project (27), could be scaled up in a national programme, whereas other options would not  
6 be feasible.  
7

8  
9 A participatory process led by representatives of RHI's mHealth and Mental Health teams was  
10 undertaken through a series of workshops where themes around healthy living were developed  
11 followed by relevant SMS messages by peer educators. Both male and female sex worker peer  
12 educators worked in groups to create the messages which aimed to encourage healthy choices and  
13 wellness. These messages took into account the importance of avoiding inadvertent disclosure of  
14 HIV status to non-participants, and could still be used by the SWP after TAPS concluded. This process  
15 produced 110 SMS messages which would be sent once a week in succession to all participants who  
16 signed up for the service.  
17  
18

19  
20 Experiences from early outreach activities directly influenced the messaging employed in each  
21 location, as well as educational materials used as part of supportive structures for generating  
22 demand and promoting awareness of the interventions. Messages focused on defining the  
23 interventions, addressing common myths and concerns around side effects, and providing  
24 information on efficacy and access.  
25  
26

27 Peer educator and potential user feedback indicated that personal testimonies are highly valued by  
28 women in both locations, so these were included on the informational pamphlets. Trained peer  
29 educators also enrolled in the study were invited to become ambassadors for the interventions so  
30 that they could directly relate their experiences and dispel rumours about side effects.  
31  
32

33 Finally, additional supportive structures for the interventions and the women using them included  
34 the CAB consisting of sex work related agencies who could help women with legal issues or post-  
35 rape care who were then also aware of the TAPS project. These helped to build on the existing SWP  
36 tried and tested referral systems where we could ensure women would get additional support  
37 beyond the scope of the TAPS clinics as needed. One result of the consultations, as well, was the  
38 need for holistic sensitivity training around sex work which was conducted with every staff member,  
39 from cleaner to clinician, at both sites. Although a more passive support mechanism provided by a  
40 local community partner organisation, this was an important, supportive measure in ensuring  
41 women felt welcome at the clinics.  
42  
43  
44

#### 45 **Focus Group Discussions**

46 The FGDs were the culmination of the formative research exploring acceptability of PrEP and early  
47 ART to be delivered in the two clinic sites. Four FGDs were held in each site with a total of 69  
48 participants. The FGDs comprised important final steps in informing design as they explored a more  
49 focused community perspective of intervention acceptability on two main levels. One level consisted  
50 of data concerning logistics and preferences around physical delivery (location, preferred clinic  
51 times, frequency of visits and HIV testing). This also spoke to the "whom" of service delivery were a  
52 significant component of the discussions was the importance of having sensitized nurses and other  
53 staff as well as underscoring the best practice of peer-driven education and communication. The  
54 other level included social and structural aspects where elements of stigma and socioeconomic  
55  
56  
57  
58  
59  
60

1  
2  
3 norms (e.g. where the need for income might supersede health) that might affect uptake and use of  
4 PrEP and early ART were explored. Since this paper is focused on feasibility and early stages of  
5 acceptability, the end-stage formative data from the FGDs are presented in a companion paper (23).  
6  
7

## 8 Discussion

9 In this paper, we have described in detail the formative research process and findings used to inform  
10 the design of the PrEP and early ART interventions implemented in TAPS. The grounded, inductive  
11 approach afforded a breadth of information around potential site locations, as well as community  
12 and stakeholder perspectives, including potential opportunities barriers to successful  
13 implementation and nuanced aspects of the urban sex work settings. These aspects were critical in  
14 considering feasibility of implementation and how to ensure the interventions accomplished reach,  
15 accessibility, acceptability, and filled the needs of potential end-users. This process allowed for  
16 consolidation of a broad scope of lessons learned to inform intervention design.  
17  
18

19  
20 Feasibility played a significant role in early decision making as to whether PrEP and early ART could  
21 be implemented, and acceptability from stakeholders, including sex workers themselves, ran in  
22 parallel. Questions of feasibility addressed site capacity, experience in delivering ARVs, experience  
23 with and access to FSWs, site locations related to FSW populations, and existing supply chains. Early  
24 acceptability was determined through consultations and engagement with potential end users in the  
25 community during outreach. Factors influencing feasibility and acceptability would not have been as  
26 comprehensively understood, such as the day to day clinic operation and the physical contexts and  
27 locales of sex work, without repeated site visits and time spent in the field. Continuous, in-depth  
28 interactions with the women themselves allowed the TAPS team to better understand sex workers'  
29 needs in addition to how interventions reach could be maximized. Additionally, identifying and  
30 addressing potential biases from providers and other stakeholders in the provision of the  
31 interventions was essential to avoid issues with maintaining permissions and supply chains as well as  
32 supportive services.  
33  
34  
35  
36

37 Generally, it would be expected that sex work populations and industries, with similar urban  
38 contexts and in relative geographical proximity, would be the same in both places and that  
39 interventions could be implemented uniformly in both locations. However, the formative research  
40 demonstrated just the opposite. While there were some similarities in how women live and work in  
41 terms of the types of locales and spaces, there were also significant differences. Sex work locales can  
42 be similarly categorized in the two cities, but the organization of these spaces and the make-up of  
43 them within Hillbrow and Pretoria is quite different in terms of women's personal safety and earning  
44 capability, for example. This translates into different sex worker populations and market dynamics  
45 and the need for adaptations to intervention design. Outreach strategies (groups versus one on one  
46 discussions) and messaging channels (word of mouth, top down through brothel owners and pimps,  
47 or developing online contacts) were dictated directly by context and the expressed needs of the  
48 FSWs.  
49  
50  
51

52  
53 While many projects have most likely undertaken similar processes in designing interventions for  
54 evaluation, taking an explicit inductive approach and the subsequent outcomes have not been  
55 reported. For instance, the Microbicides Development Programme (MDP) has 102 associated  
56 references (28), the majority of which come from the MDP 301 study (29). There is a detailed  
57  
58  
59



1  
2  
3 published study protocol (30), and several background papers (31–36), however, no detail on the  
4 qualitative aspects contributing to the design-related decision making. By presenting this paper, we  
5 argue that those details are important for future study, intervention, and product implementation  
6 design where previous lessons learned from formative research and methodology can potentially  
7 support future researchers and implementers as well as inform research processes and design.  
8  
9

## 10 **Conclusions**

11 The lessons learned from this formative research process were directly applied to the design and  
12 implementation of the PrEP and early ART interventions delivered through the TAPS project. The  
13 inductive approach afforded the opportunity to adapt and include voices and perspectives, which  
14 might have otherwise been missed, and clarified the needs of the population as well as how to reach  
15 them appropriately. This research illustrated how sex work environments can vary, even when the  
16 settings are very similar, and therefore implementation of interventions is unlikely to be uniform  
17 across contexts. Formative research is critical in designing interventions, especially in new  
18 environments but also in well-known contexts. Including intensive stakeholder engagement in  
19 formative research will help to ensure that interventions are designed with feasibility and relevance  
20 for populations in mind.  
21  
22  
23  
24

## 25 **Declarations**

### 26 **Ethics approval and consent to participate**

27 Formal ethical approval was provided by the Wits Human Ethics Research Committee (reference  
28 number: M131009) for the focus group discussions which included information testing and  
29 community engagement in the field to inform the development of discussion guides. All documents  
30 containing data were saved electronically in central folders with limited access to relevant project  
31 staff. No participant identifiers were included in any of the reports that were produced. With regard  
32 to other formative research elements, no individual data were collected or reported, and ethical  
33 principles of the Helsinki Declaration were strictly adhered to as part of this iterative and flexible  
34 approach.  
35  
36  
37

### 38 **Availability of data and materials**

39 All data generated or analysed during this study are included in this published article.  
40  
41

### 42 **Competing interests**

43 The authors have no declarations or conflicts of interest associated with this work.  
44  
45

### 46 **Funding**

47 This research was in part supported by funds from AIDS Fonds Netherlands (and the Bill and Melinda  
48 Gates Foundation (grant OPP1084416).  
49  
50

### 51 **Patient and Public Involvement**

52 This research was entirely based on potential patients' priorities, experience, and preferences. Both  
53 potential end-users and other stakeholders were involved throughout each step of the formative  
54 research and in the active TAPS project as well, as described throughout this paper. The Wits RHI  
55 SWP is based on a sex worker peer-led model of service which supported all of this work (including  
56  
57

1  
2  
3 general outreach as well as recruitment for the FGDs). Results of this work were disseminated to the  
4 community and stakeholders as decisions were made and through the implementation of TAPS.  
5

#### 6 **Author Contributions**

7 RE developed the research agenda, designed data collection tools, participated in data collection,  
8 wrote and collected field notes, analysed the data, and drafted the paper. JM participated in data  
9 collection and analysed data. NM and MS participated in data collection. AB supported design of  
10 data collection tools and data analysis. RE, GG, FV, and HR made final decisions on intervention  
11 design. All authors reviewed and contributed to the paper.  
12  
13

#### 14 **Acknowledgements**

15 We would like to thank the many women who participated in this formative research as well as the  
16 stakeholders and staff who engaged in helping us design the PrEP and early ART interventions for  
17 the TAPS Demonstration Project.  
18  
19  
20  
21  
22  
23  
24  
25  
26  
27  
28  
29  
30  
31  
32  
33  
34  
35  
36  
37  
38  
39  
40  
41  
42  
43  
44  
45  
46  
47  
48  
49  
50  
51  
52  
53  
54  
55  
56  
57  
58  
59  
60

## References

1. UNAIDS. Good participatory practice: Guidelines for biomedical HIV prevention trials [Internet]. 2011 [cited 2016 Sep 28]. Available from: [http://www.unaids.org/en/resources/documents/2011/20110629\\_JC1853\\_GPP\\_Guidelines\\_2011%20OK](http://www.unaids.org/en/resources/documents/2011/20110629_JC1853_GPP_Guidelines_2011%20OK)
2. Tolley EE, Ulin PR, Mack N, Succop SM, Robinson ET. *Qualitative Methods in Public Health: A Field Guide for Applied Research*. John Wiley & Sons; 2016. 480 p.
3. Milat AJ, King L, Bauman AE, Redman S. The concept of scalability: increasing the scale and potential adoption of health promotion interventions into policy and practice. *Health Promot Int*. 2013 Sep 1;28(3):285–98.
4. Milat AJ, Bauman A, Redman S. Narrative review of models and success factors for scaling up public health interventions. *Implement Sci*. 2015;10:113.
5. World Health Organization. Scaling up projects and initiatives for better health: from concepts to practice [Internet]. 2016 [cited 2017 Apr 17]. Available from: [http://www.euro.who.int/\\_\\_data/assets/pdf\\_file/0004/318982/Scaling-up-reports-projects-concepts-practice.pdf](http://www.euro.who.int/__data/assets/pdf_file/0004/318982/Scaling-up-reports-projects-concepts-practice.pdf)
6. Fonner VA, Dalglish SL, Kennedy CE, Baggaley R, O'Reilly KR, Koechlin FM, et al. Effectiveness and safety of oral HIV preexposure prophylaxis for all populations. *AIDS Lond Engl*. 2016 Jul 31;30(12):1973–83.
7. World Health Organization. WHO | Guideline on when to start antiretroviral therapy and on pre-exposure prophylaxis for HIV [Internet]. 2015 [cited 2015 Oct 28]. Available from: <http://www.who.int/hiv/pub/guidelines/earlyrelease-arv/en/>
8. UNAIDS. Global AIDS Update [Internet]. 2016. Available from: <http://www.unaids.org/en/resources/documents/2016/Global-AIDS-update-2016>
9. South African National AIDS Programme. South Africa's National Strategic Plan for HIV, TB, and STIs 2017-2022 [Internet]. 2017. Available from: [http://sanac.org.za/wp-content/uploads/2017/05/NSP\\_FullDocument\\_FINAL.pdf](http://sanac.org.za/wp-content/uploads/2017/05/NSP_FullDocument_FINAL.pdf)
10. World Health Organization. PrEP demonstration projects: A framework for country level protocol development. A draft for review and discussion. 2013.
11. Cremin I, Alsallaq R, Dybul M, Piot P, Garnett G, Hallett TB. The new role of antiretrovirals in combination HIV prevention: a mathematical modelling analysis. *AIDS*. 2013 Jan;27(3):447–58.
12. Gomez GB, Borquez A, Case KK, Wheelock A, Vassall A, Hankins C. The Cost and Impact of Scaling Up Pre-exposure Prophylaxis for HIV Prevention: A Systematic Review of Cost-Effectiveness Modelling Studies. *PLoS Med*. 2013 Mar 12;10(3):e1001401.
13. Hallett TB. Priorities across the continuum of care: modelling the impact of interventions on mortality and HIV transmission. In Vancouver, Canada; 2015.
14. Rees H, Beksinska ME, Dickson-Tetteh K, Ballard RC, Htun Y. Commercial sex workers in Johannesburg: risk behaviour and HIV status. *South Afr J Sci*. 2000 Jun;96:283–4.

15. Williams BG, Taljaard D, Campbell CM, Gouws E, Ndhlovu L, Van Dam J, et al. Changing patterns of knowledge, reported behaviour and sexually transmitted infections in a South African gold mining community. *AIDS Lond Engl*. 2003 Sep 26;17(14):2099–107.
16. Ramjee G, Karim SS, Sturm AW. Sexually transmitted infections among sex workers in KwaZulu-Natal, South Africa. *Sex Transm Dis*. 1998 Aug;25(7):346–9.
17. UCSF, Anova Health Institute, Wits RHI. South African Health Monitoring Survey (SAHMS): An Integrated Biological and Behavioural Survey among Female Sex Workers, South Africa 2013 – 2014. San Francisco: UCSF; 2015.
18. Gomez GB, Eakle R, Mbogua J, Akpomiemie G, Venter WDF, Rees H. Treatment And Prevention for female Sex workers in South Africa: protocol for the TAPS Demonstration Project. *BMJ Open*. 2016 Sep 1;6(9):e011595.
19. The Discovery of Grounded Theory; Strategies for Qualitative... : Nursing Research [Internet]. [cited 2014 Jun 2]. Available from: [http://journals.lww.com/nursingresearchonline/Fulltext/1968/07000/The\\_Discovery\\_of\\_Grounded\\_Theory\\_\\_Strategies\\_for.14.aspx](http://journals.lww.com/nursingresearchonline/Fulltext/1968/07000/The_Discovery_of_Grounded_Theory__Strategies_for.14.aspx)
20. Charmaz K. Constructing Grounded Theory [Internet]. Second Edition. SAGE Publications Ltd; 2006 [cited 2018 Feb 9]. Available from: <https://uk.sagepub.com/en-gb/eur/constructing-grounded-theory/book235960>
21. Sibanyoni M. Sex in the Cities: Comprehensive healthcare for sex workers. In 2015. Available from: [http://www.saaids.co.za/Presentations2/Wednesday%2010%20June%202015/Hall%206/Setellite%20session%2014h00\\_Wits%20RHI/pdf/SWMC%20SAAIDS%20Presentation.pdf](http://www.saaids.co.za/Presentations2/Wednesday%2010%20June%202015/Hall%206/Setellite%20session%2014h00_Wits%20RHI/pdf/SWMC%20SAAIDS%20Presentation.pdf)
22. Braun V, Clarke V. Using thematic analysis in psychology. *Qual Res Psychol*. 2006 Jan;3(2):77–101.
23. Eakle R, Bourne A, Mbogua J, Mutanha N, Rees H. Exploring acceptability of oral PrEP prior to implementation among female sex workers in South Africa. *J Int AIDS Soc*. 2018 Feb 1;21(2):n/a-n/a.
24. UNAIDS. Sex workers' hopes and fears for HIV pre-exposure prophylaxis: recommendations from a UNAIDS consultation meeting. Johannesburg, South Africa: Wits RHI; 2014.
25. AVAC. Engagement For Impact - Home [Internet]. [cited 2017 May 4]. Available from: <https://www.engagementforimpact.org/toolkit/>
26. World Health Organization, United Nations Population Fund, Joint United Nations Programme on HIV/AIDS, Global Network, of Sex Work Projects, The World Bank. Implementing comprehensive HIV/STI programmes with sex workers: practical approaches from collaborative interventions. Geneva: World Health Organization; 2013.
27. Coleman J, Bohlin KC, Thorson A, Black V, Mechael P, Mangxaba J, et al. Effectiveness of an SMS-based maternal mHealth intervention to improve clinical outcomes of HIV-positive pregnant women. *AIDS Care*. 2017 Jan 20;1–8.
28. MDP Microbicides Development Programme [Internet]. Available from: <http://www.mdp.mrc.ac.uk/publications.html>

- 1
- 2
- 3 29. McCormack S, Ramjee G, Kamali A, Rees H, Crook AM, Gafos M, et al. PRO2000 vaginal gel for
- 4 prevention of HIV-1 infection (Microbicides Development Programme 301): a phase 3,
- 5 randomised, double-blind, parallel-group trial. *Lancet*. 2010 Oct 16;376(9749):1329–37.
- 6
- 7 30. Nunn A, McCormack S, Crook AM, Pool R, Rutterford C, Hayes R. Microbicides Development
- 8 Programme: design of a phase III trial to measure the efficacy of the vaginal microbicide PRO
- 9 2000/5 for HIV prevention. *Trials*. 2009 Oct 27;10:99.
- 10
- 11 31. Kamali A, Byomire H, Muwonge C, Bakobaki J, Rutterford C, Okong P, et al. A randomised
- 12 placebo-controlled safety and acceptability trial of PRO 2000 vaginal microbicide gel in sexually
- 13 active women in Uganda. *Sex Transm Infect*. 2010 Jun 1;86(3):222–6.
- 14
- 15 32. Lees S, Cook C, Vallely A, Desmond N, Allen C, Kiro K, et al. Comparison of sexual behavior data
- 16 collected using a coital diary and a clinic-based interview during a microbicide pilot study in
- 17 Mwanza, Tanzania. *Sex Transm Dis*. 2010 Aug;37(8):497–501.
- 18
- 19 33. Lees S, Desmond N, Allen C, Bugeke G, Vallely A, Ross D. Sexual risk behaviour for women
- 20 working in recreational venues in Mwanza, Tanzania: considerations for the acceptability and
- 21 use of vaginal microbicide gels. *Cult Health Sex*. 2009 Aug 1;11(6):581–95.
- 22
- 23 34. MacPhail C, Terris-Prestholt F, Kumaranayake L, Ngoako P, Watts C, Rees H. Managing men:
- 24 women’s dilemmas about overt and covert use of barrier methods for HIV prevention. *Cult*
- 25 *Health Sex*. 2009 Jun;11(5):485–97.
- 26
- 27 35. Ndinda C, Chimbwete C, McGrath N, Pool R, Mdp Group null. Community attitudes towards
- 28 individuals living with HIV in rural KwaZulu-Natal, South Africa. *AIDS Care*. 2007 Jan;19(1):92–
- 29 101.
- 30
- 31 36. Gist P, Langley D. Application of Standard Project Management Tools to Research – A Case Study
- 32 from a Multi-national Clinical Trial. *J Res Adm [Internet]*. 2007 [cited 2018 Feb
- 33 14];XXXVIII(Number 2). Available from: <https://files.eric.ed.gov/fulltext/EJ902225.pdf>
- 34
- 35
- 36
- 37
- 38
- 39
- 40
- 41
- 42
- 43
- 44
- 45
- 46
- 47
- 48
- 49
- 50
- 51
- 52
- 53
- 54
- 55
- 56
- 57
- 58
- 59
- 60

1  
2  
3 *Figure 1. The formative research process and timeline to design the PrEP and early ART interventions for TAPS.*  
4

5 Abbreviations: ppts = participants; SMS = Short Message System; FGDs = Focus Group Discussions  
6  
7

8 *Figure 2. Map of TAPS and Wits RHI SWP Sites in South Africa*  
9

10 Note: Green labels and arrows indicate selected sites; Red labels and arrows indicate sites not selected; Grey labels and  
11 arrows indicate other Wits RHI Sex Worker Programme sites.  
12  
13  
14  
15  
16  
17  
18  
19  
20  
21  
22  
23  
24  
25  
26  
27  
28  
29  
30  
31  
32  
33  
34  
35  
36  
37  
38  
39  
40  
41  
42  
43  
44  
45  
46  
47  
48  
49  
50  
51  
52  
53  
54  
55  
56  
57  
58  
59  
60

For peer review only

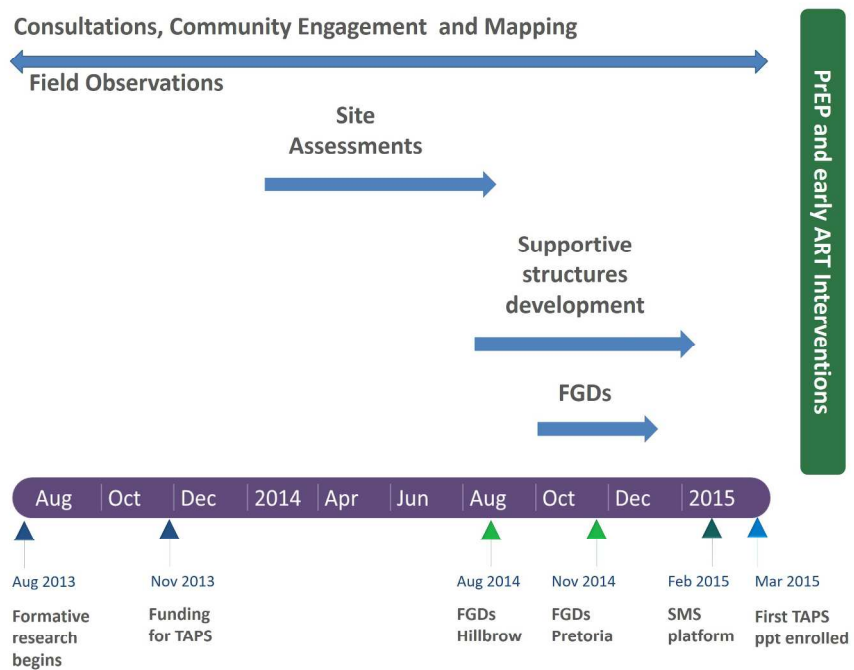

Figure 1. The formative research process and timeline to design the PrEP and early ART interventions for TAPS.

Abbreviations: ppts = participants; SMS = Short Message System; FGDs = Focus Group Discussions

243x187mm (300 x 300 DPI)

Only

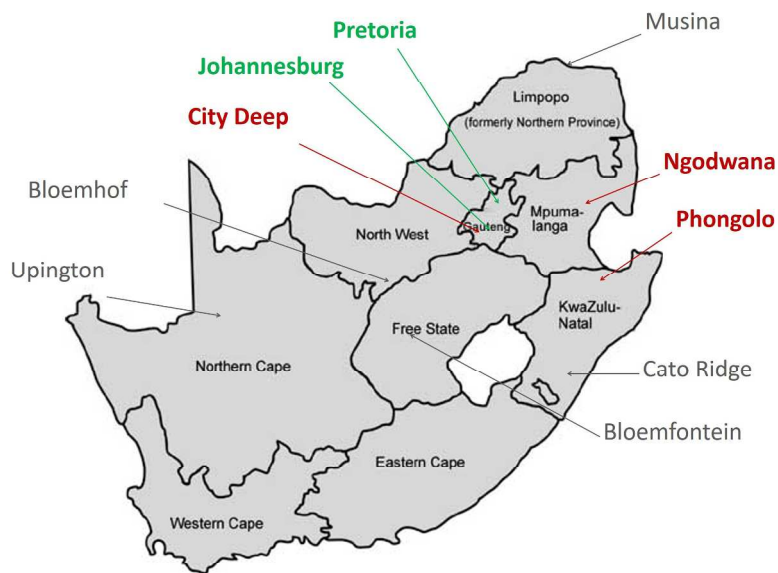

Figure 2. Map of TAPS and Wits RHI SWP Sites in South Africa

Note: Green labels and arrows indicate selected sites; Red labels and arrows indicate sites not selected; Grey labels and arrows indicate other Wits RHI Sex Worker Programme sites.

243x187mm (300 x 300 DPI)

only
